# Supplementary material
Source: PubMed Central journal article supplement (PMC3963435)
Supplement: es4048472_si_001.pdf [file es4048472_si_001.pdf]

# Inhalable microorganisms in Beijing's PM<sub>2.5</sub> and PM<sub>10</sub> pollutants during a severe smog event

Chen Cao, Wenjun Jiang, Buyang Wang, Jianhuo Fang, Jidong Lang, Geng Tian\*,

Jingkun Jiang\*, Ting F. Zhu\*

## Supporting Information

### Contents

|                                                                                                                                                                    |          |
|--------------------------------------------------------------------------------------------------------------------------------------------------------------------|----------|
| <b>Text: Detailed methods</b> .....                                                                                                                                | <b>3</b> |
| PM and meteorological data.....                                                                                                                                    | 3        |
| Scanning Electron Microscopy .....                                                                                                                                 | 3        |
| OC and EC analysis.....                                                                                                                                            | 4        |
| Elemental analysis.....                                                                                                                                            | 4        |
| Water soluble ions.....                                                                                                                                            | 5        |
| <b>14 Figures (Detailed results of metagenomic analysis)</b> .....                                                                                                 | <b>5</b> |
| Figure S1 Rarefaction curves of PM <sub>2.5</sub> and PM <sub>10</sub> samples sequenced by MiSeq and HiSeq platforms.....                                         | 6        |
| Figure S2 Phylogenetic tree of bacteria and archaea identified from PM <sub>2.5</sub> and PM <sub>10</sub> samples .....                                           | 7        |
| Figure S3 Heatmaps of the relative abundance of bacteria and archaea identified by MetaPhlAn.....                                                                  | 9        |
| Figure S4 Variations of the genome-size-normalized relative abundance of the most common bacterial, fungal, and viral species .....                                | 11       |
| Figure S5 Daily variations of the normalized hit abundance of human adenovirus C in the collected PM <sub>2.5</sub> and PM <sub>10</sub> samples.....              | 13       |
| Figure S6 Original habitats of the bacteria identified from the Tsinghua PM <sub>2.5</sub> and PM <sub>10</sub> samples compared with three previous studies ..... | 14       |
| Figure S7 PM <sub>2.5</sub> and PM <sub>10</sub> concentration of Beijing, Haidian district and Tsinghua monitoring site.....                                      | 15       |
| Figure S8 Meteorological data plotted with PM <sub>2.5</sub> and PM <sub>10</sub> concentration in January 2013 .....                                              | 16       |
| Figure S9 Filter coloration and SEM images of PM <sub>2.5</sub> and PM <sub>10</sub> samples.....                                                                  | 17       |
| Figure S10 Number of overlapping airborne microbes at the genus level between Tsinghua PM study and three previous studies.....                                    | 18       |
| Figure S11 Principle component analysis of dinucleotide frequency of pooled PM <sub>2.5</sub> samples and PM <sub>10</sub> samples.....                            | 19       |
| Figure S12 Percentage increase of 53 common species identified from PM samples .....                                                                               | 20       |

|                                                                                                                                           |           |
|-------------------------------------------------------------------------------------------------------------------------------------------|-----------|
| Figure S13 Images of cultured <i>Aspergillus fumigatus</i> from PM samples .....                                                          | 21        |
| <b>11 Tables (Detailed results of metagenomic analysis) .....</b>                                                                         | <b>22</b> |
| Table S1 Summary of sequencing data .....                                                                                                 | 22        |
| Table S2 Genome coverage of the 48 most common bacterial, 2 fungal, and 3 viral species .....                                             | 23        |
| Table S3 Genome-size-normalized relative abundance of the 48 most common bacterial, 2 fungal, and 3 viral species .....                   | 25        |
| Table S4 Summary of PM and meteorological data.....                                                                                       | 27        |
| Table S5 Airborne bacteria identified at the genus level from Tsinghua PM study and three previous studies combined .....                 | 28        |
| Table S6 Public data of metagenomic studies used in PCA analysis.....                                                                     | 32        |
| Table S7 Annotations of the 48 most common bacterial, 2 fungal, and 3 viral species                                                       | 33        |
| Table S8 Primers and Sanger sequencing results.....                                                                                       | 36        |
| Table S9 Estimated concentrations of organic carbon and elemental carbon measured in PM <sub>2.5</sub> and PM <sub>10</sub> samples ..... | 37        |
| Table S10 Estimated concentrations of anions and cations measured in PM <sub>2.5</sub> and PM <sub>10</sub> samples .....                 | 38        |
| Table S11 Estimated concentrations of elements measured in PM <sub>2.5</sub> and PM <sub>10</sub> samples                                 | 39        |
| <b>References .....</b>                                                                                                                   | <b>40</b> |

## **Detailed Methods**

### ***PM and meteorological data***

To address the increasing public health concerns, China revised its Ambient Air Quality Standard in 2012, including PM<sub>2.5</sub> as an air quality index in addition to PM<sub>10</sub><sup>1</sup>. The 24 h average concentrations (9:00 AM- 9:00 AM the next day) of PM<sub>2.5</sub> and PM<sub>10</sub> from the 3 nearest official monitoring sites in Haidian District and the averaged PM<sub>2.5</sub> concentration of Beijing from 35 monitoring sites, operated by the Beijing Municipal Environmental Monitoring Center, were recorded from the official website (<http://zx.bjmemc.com.cn/>) as a comparison (Figure 1A and Supporting Information, Figure S7, Table S4). Air Quality Index (AQI) data (Supporting Information, Table S4) of the same 3 monitoring sites were provided by Beijing Municipal Environmental Protection Bureau website (<http://www.bjepb.gov.cn/>). Meteorological data of Haidian District, including temperature (°C), relative humidity (%), atmospheric pressure (Hpa), and wind velocity (m/s) were downloaded from the China Meteorological Data Sharing Service System (<http://cdc.bjmb.gov.cn/>) hourly (Supporting Information, Table S4 and Figure S8). The meteorological data of Beijing were recorded from the National Meteorological Center of China Meteorological Administration (<http://www.nmc.gov.cn/>). Daily PM<sub>2.5</sub> concentrations of the 74 key cities in the national PM<sub>2.5</sub> monitoring network were provided by China National Environmental Monitoring Center (<http://113.108.142.147:20035/emcpublish/>).

### ***Scanning Electron Microscopy***

Scanning Electron Microscopy (SEM) was performed using a QUANTA 200 SEM (FEI, Czech). Small pieces (0.5 cm×0.5 cm) of Tissuquartz filter samples were mounted

on aluminum SEM stubs using double-sided adhesive carbon tapes, and gold-coated using an Ion Sputtering Instrument E-1010 (Hitachi, Japan) prior to imaging. The beam voltage was set to 15.0 kV.

### ***OC and EC analysis***

We analyzed the organic carbon (OC) and elemental carbon (EC) concentrations of the collected filter samples using a DRI 2001A thermal optical reflectance (TOR) carbon analyzer (Atmoslytic Inc Corp., CA, US). Its detection limits for OC and EC were 0.82 and 0.20  $\mu\text{g C}/\text{cm}^2$ , respectively. The IMPROVE\_A temperature program was used in our analysis<sup>2,3</sup>. For OC, a small sample (0.522  $\text{cm}^2$ ) from the quartz filter was heated under four temperatures sequentially (140, 280, 480, and 580 °C) under a helium environment. In this procedure, carbon compounds in the PM samples were transformed to carbon dioxide, which was then reduced to methane over a manganese dioxide catalyst. A flame ionization detector (FID) was used to detect the peak area of methane for estimating the concentration of organic carbon. For EC, the filter was heated at the temperatures of 580, 740, and 840 °C, respectively, and the carrier gas used was a mixture of oxygen (2%) and helium (98%). Elemental carbon was oxidized to carbon dioxide first, followed by reduction to methane and detection using FID. The reflectance of the filter was monitored with a laser to determine the cut-point of OC and EC. Both helium and oxygen were purchased from Beijing AP BAIF Gases Industry Co., Ltd (Beijing, China).

### ***Elemental analysis***

Energy dispersive X-ray fluorescence (PANalytical B. V., the Netherlands Corp., NED) was used to measure the concentrations of elements in the PM samples<sup>4</sup>. Nine elements (Ti, Mn, Ni, Cr, Zn, As, Pb, Fe, and Br) were analyzed. Filter papers from the

MicroMatter company film (Micromatter Corp., Vancouver, Canada) and the NIST SRM 2783 standard substance were used to calibrate the instrument. In addition, for every ten samples, we randomly selected one of them to check for repeatability. A blank filter was analyzed as a negative control. The margin of error was <5% for Fe and Zn, <10% for Mn and Br, and 15% for Ti, Cr, and Pb, respectively. Since Ni and As were low in abundance in samples, the error was ~20%.

### ***Water soluble ions***

Ion chromatography (IC) was used to measure the water soluble ions in the PM samples<sup>4</sup>, including five anions ( $\text{SO}_4^{2-}$ ,  $\text{NO}_3^-$ ,  $\text{Cl}^-$ ,  $\text{F}^-$ , and  $\text{PO}_4^{3-}$ ) and five cations ( $\text{Na}^+$ ,  $\text{K}^+$ ,  $\text{Mg}^{2+}$ ,  $\text{Ca}^{2+}$ , and  $\text{NH}_4^+$ ). Dionex ICS-2000 with CS12 columns (Dionex Corp., CA, US) were used for the cation analysis, and Dionex ICS-90A with AS11-HC columns (Dionex Corp., CA, US) were used for the anion analysis. A blank filter was analyzed as a negative control. The method detection limits were 0.01 mg/L for  $\text{K}^+$ ,  $\text{Na}^+$ , and  $\text{Mg}^{2+}$ , 0.02 mg/L for  $\text{F}^-$ ,  $\text{Cl}^-$ ,  $\text{NH}_4^+$ , and  $\text{Ca}^{2+}$ , and 0.05 mg/L for  $\text{SO}_4^{2-}$ ,  $\text{PO}_4^{3-}$ , and  $\text{NO}_3^-$ .

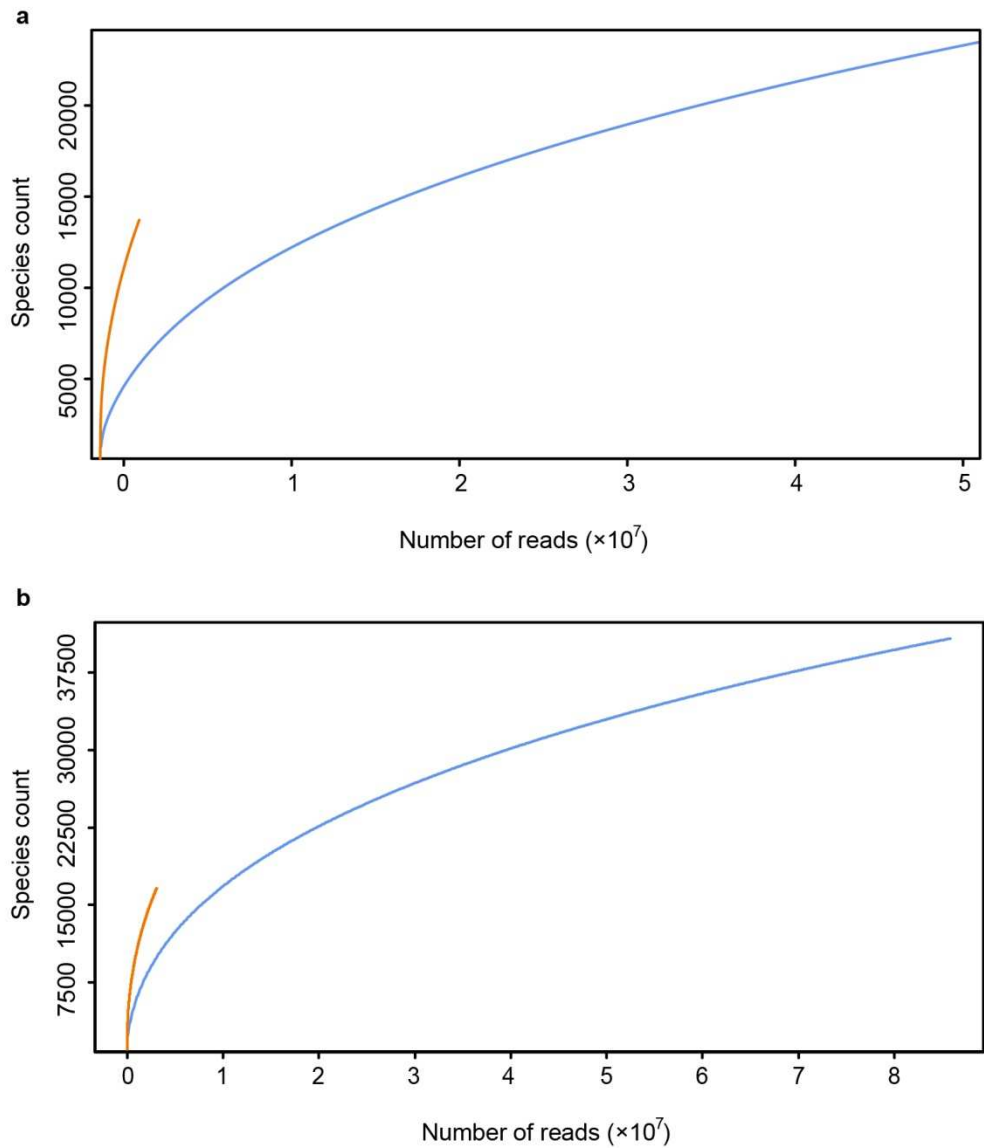

**Figure S1.** Rarefaction curves of PM<sub>2.5</sub> and PM<sub>10</sub> samples sequenced by MiSeq and HiSeq platforms. Rarefaction curves of **a**) PM<sub>2.5</sub> and **b**) PM<sub>10</sub> samples collected on January 14, 2013, analyzed by MG-RAST. Orange lines correspond to the MiSeq data, while the blue lines correspond to the HiSeq data of the same day.

a

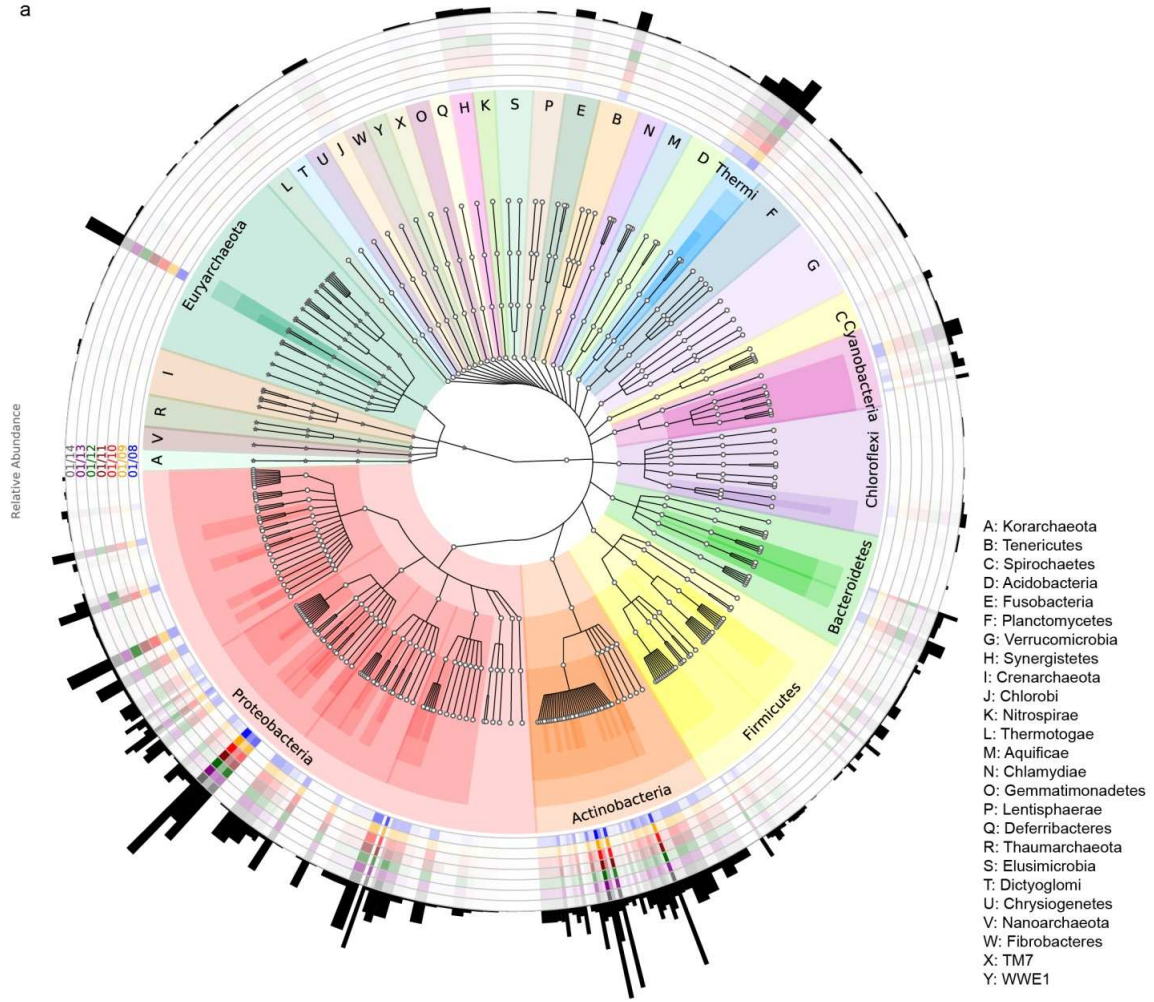

b

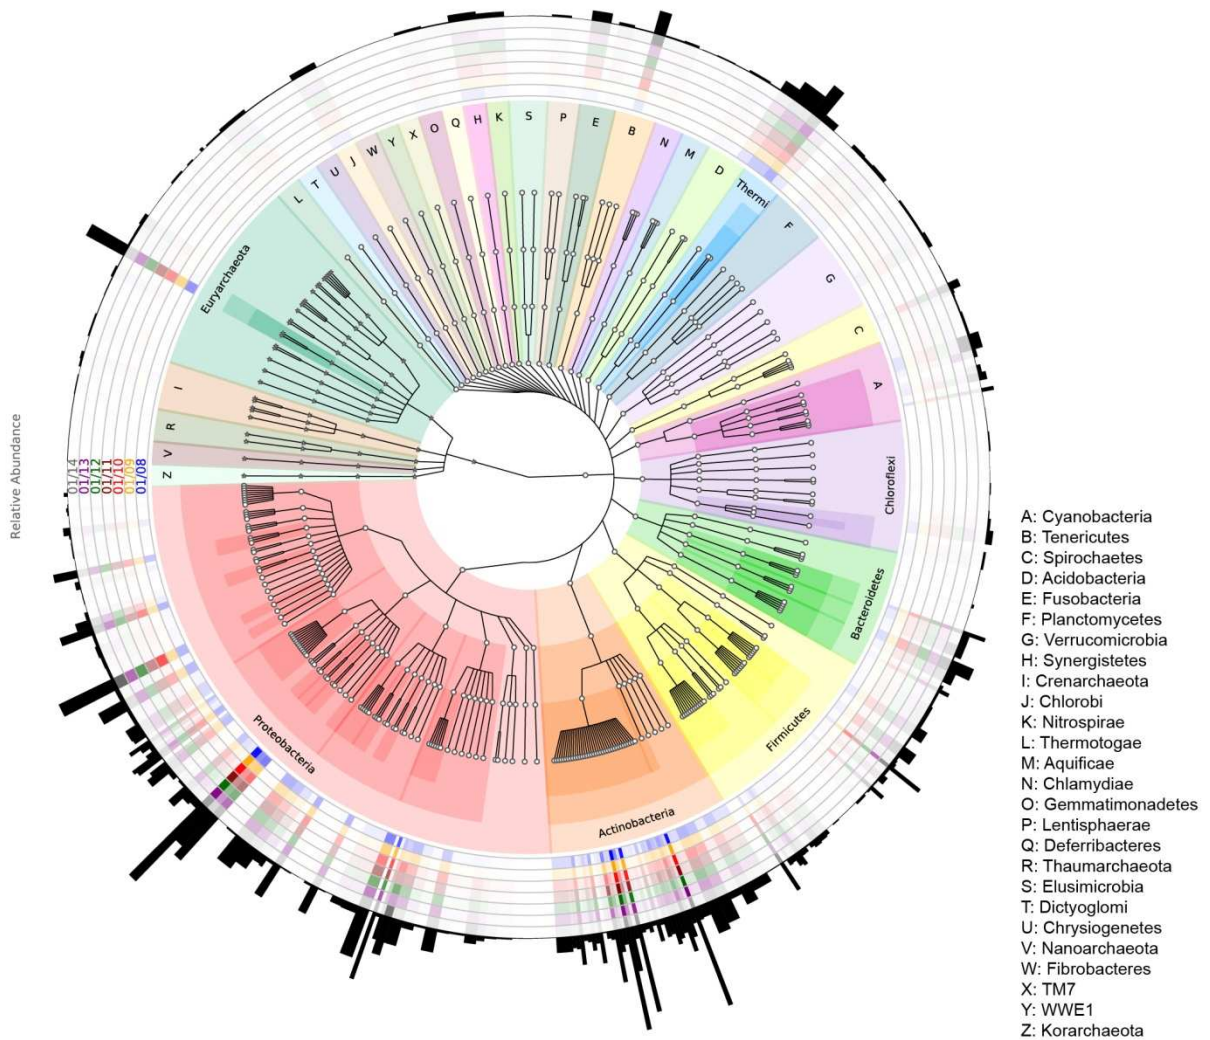

**Figure S2.** Phylogenetic tree of bacteria and archaea identified from PM<sub>2.5</sub> and PM<sub>10</sub> samples.

Each phylum and species with >1% relative abundance were labeled by different colors at the class, order, and family levels. Black bars in the outmost ring represent the overall relative abundance of each family by height. The 7 transparent rings show the relative abundance of each family during the 7 sampling days, represented by the shade of the color blocks. **a)** PM<sub>2.5</sub> samples. **b)** PM<sub>10</sub> samples.



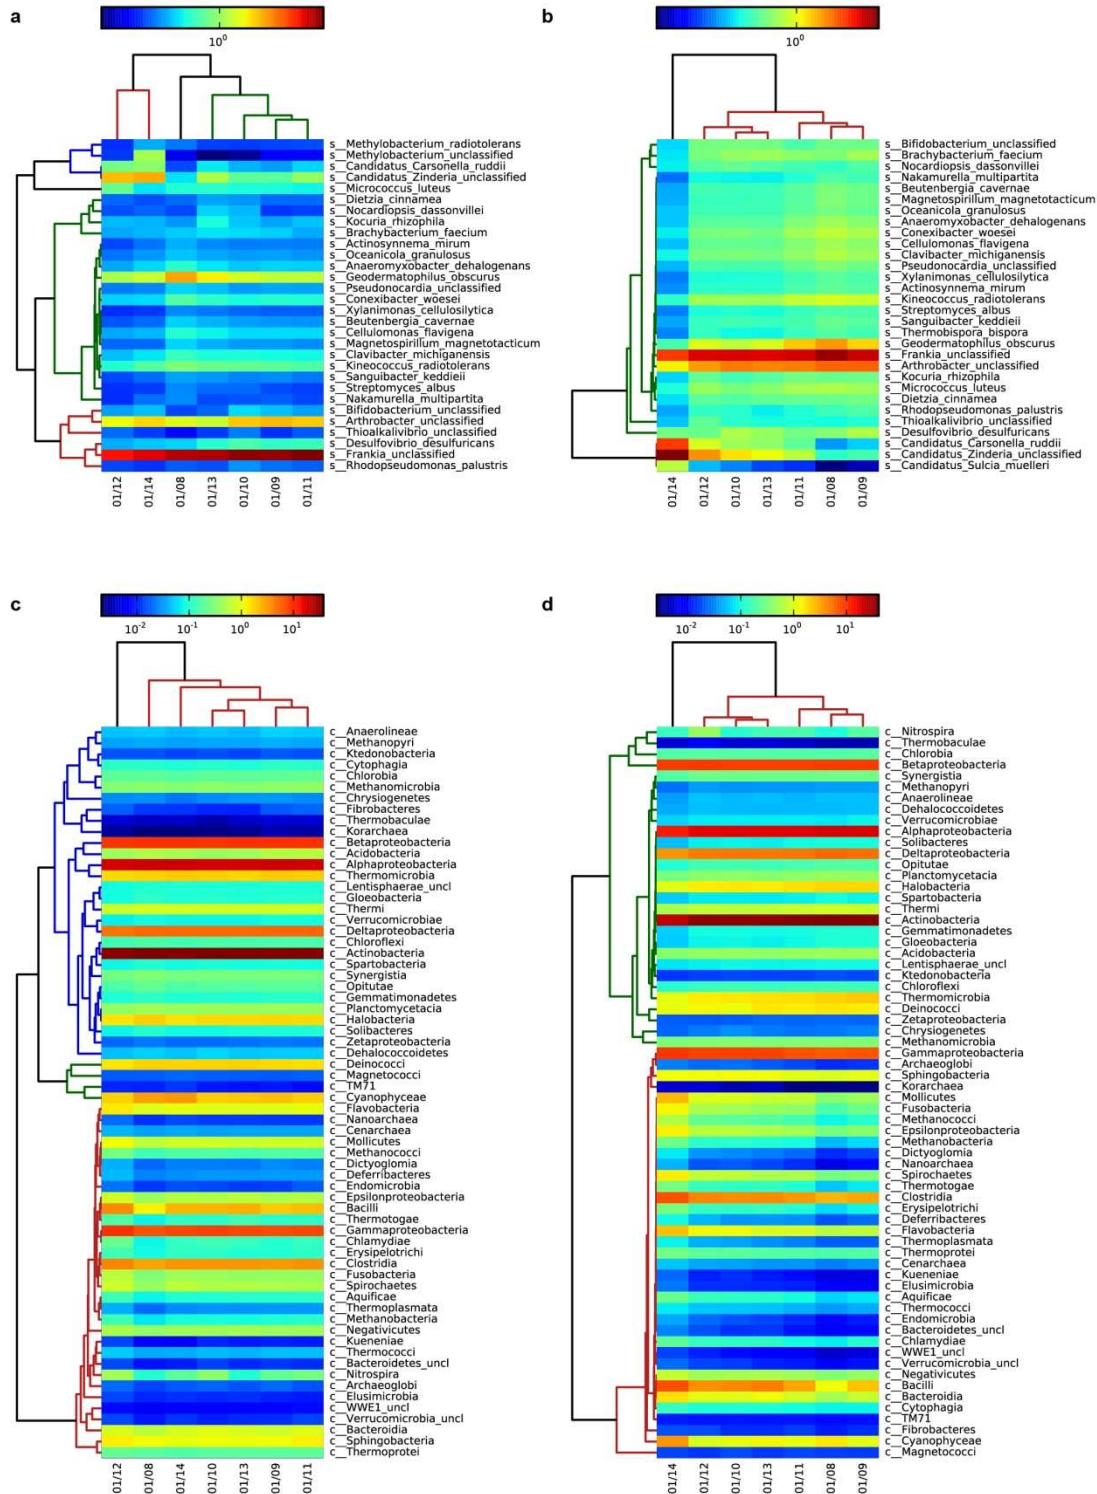

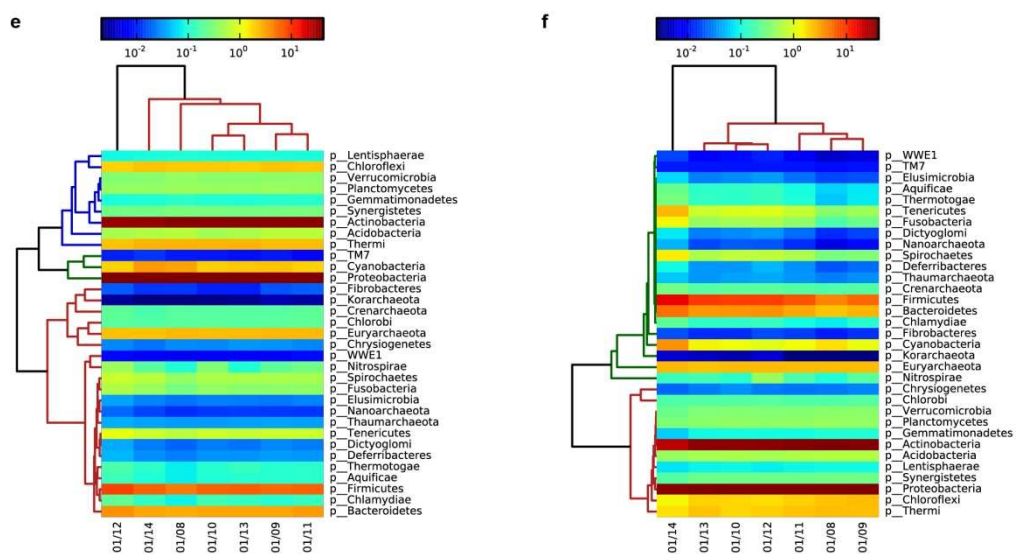

**Figure S3.** Heatmaps of the relative abundance of bacteria and archaea identified by MetaPhlAn.

The relative abundance ( $\log_{10}$  scale) of bacteria and archaea identified by MetaPhlAn at the species (**a**, **b**), class (**c**, **d**) and phylum (**e**, **f**) levels from  $PM_{2.5}$  (**a**, **c**, **e**) and  $PM_{10}$  (**b**, **d**, **f**) samples during the 7 sampling days (at species level, only the most abundant 30 species were plotted).

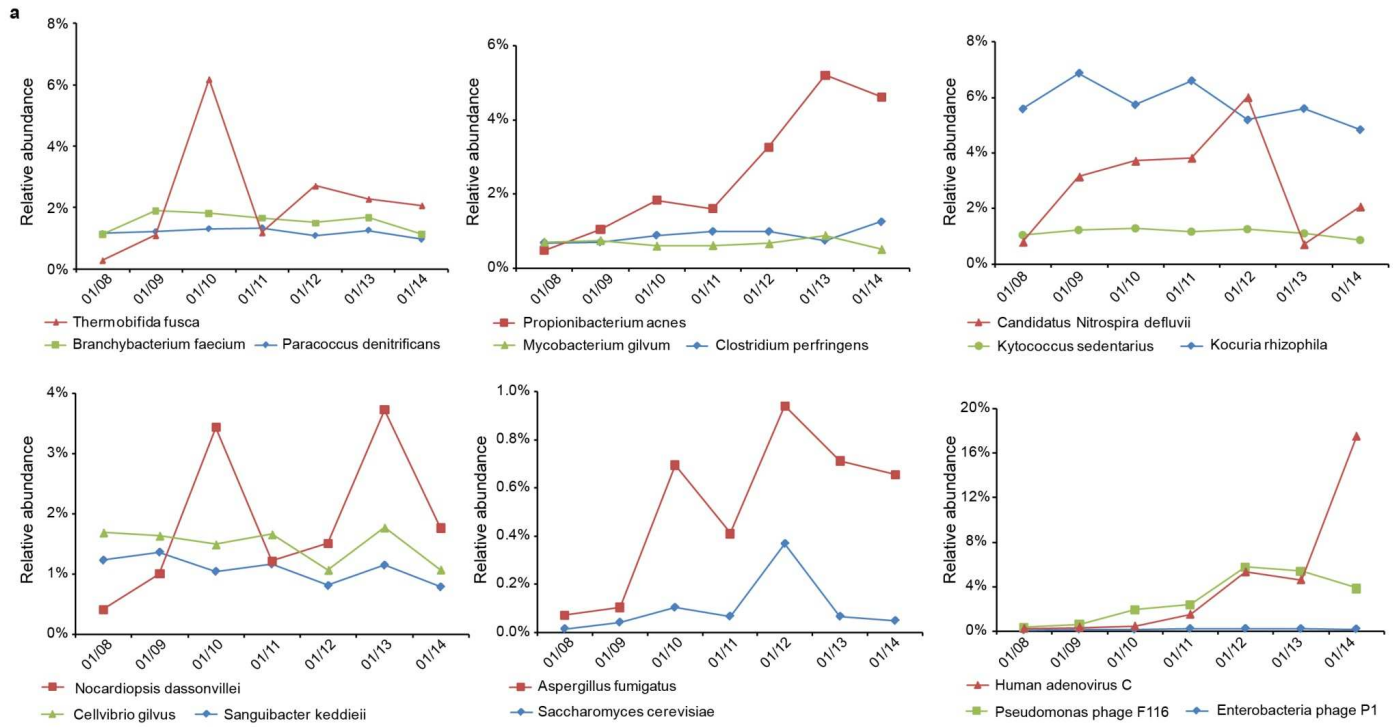

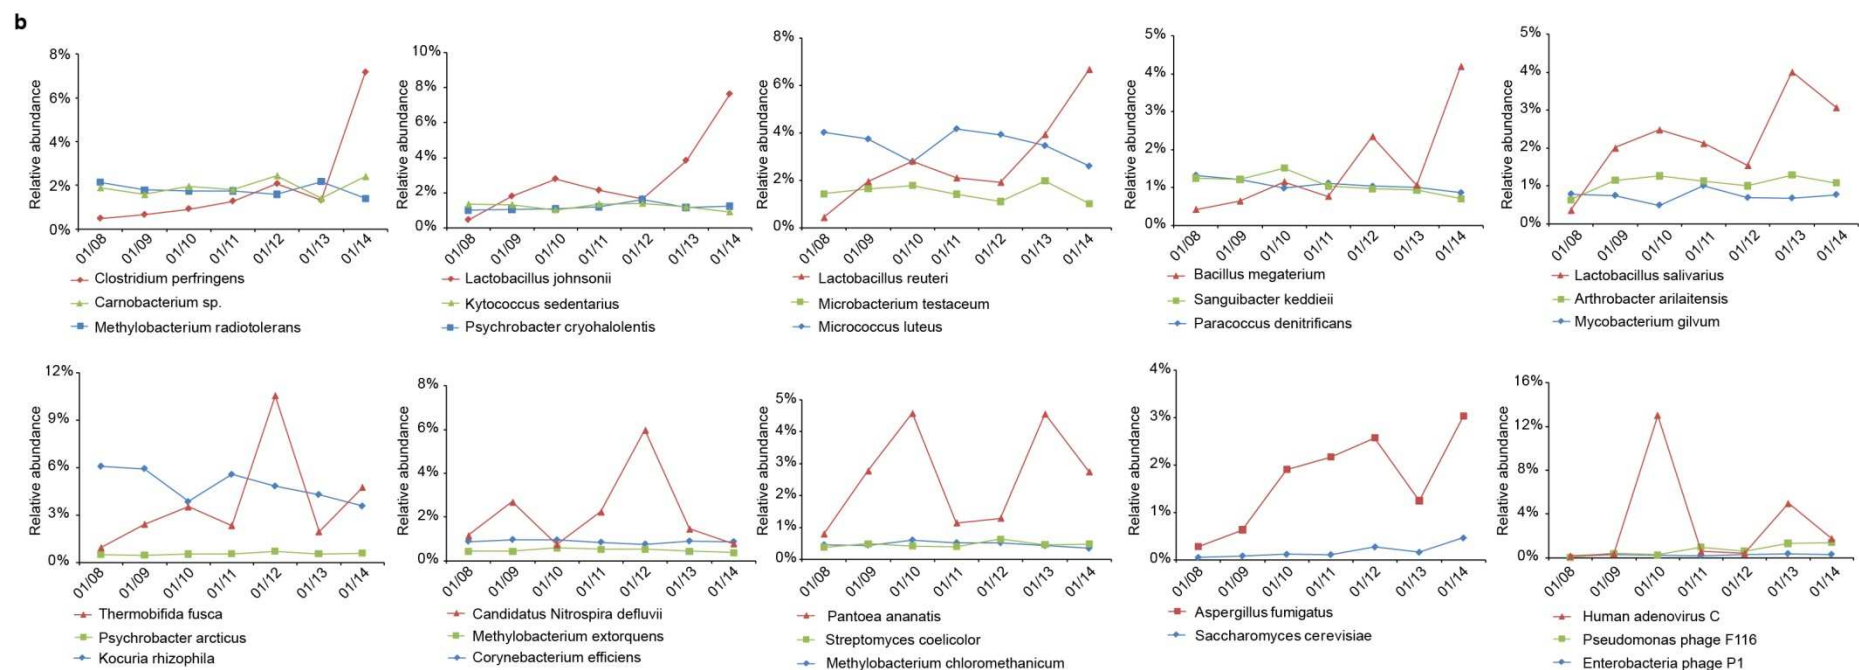

**Figure S4.** Variations of the genome-size-normalized relative abundance of the most common bacterial, fungal, and viral species. **a)** PM<sub>2.5</sub> samples. **b)** PM<sub>10</sub> samples. Species with S.D. value of their relative abundance ( $\log_{10}$  scale) in seven days greater than 0.3 were selected as high variation species (plotted in red), and plotted with one or two other species in the same kingdom for comparison.

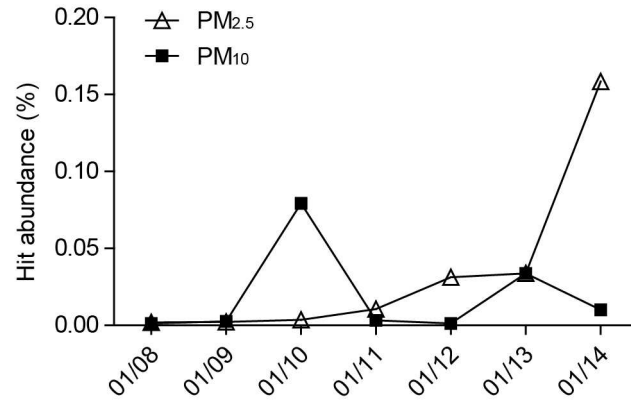

**Figure S5.** Daily variations of the normalized hit abundance of human adenovirus C in the collected PM<sub>2.5</sub> and PM<sub>10</sub> samples.

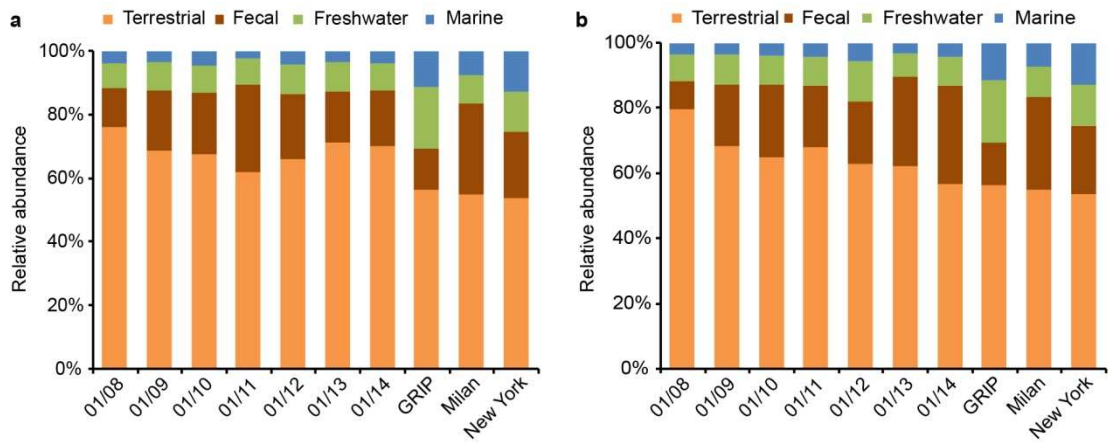

**Figure S6.** Original habitats of the bacteria identified from the Tsinghua PM<sub>2.5</sub> and PM<sub>10</sub> samples compared with three previous studies.

Original habitats of the bacteria identified from the Tsinghua **a)** PM<sub>2.5</sub> and **b)** PM<sub>10</sub> samples compared with those from the GRIP high-altitude, Milan urban, and New York subway studies

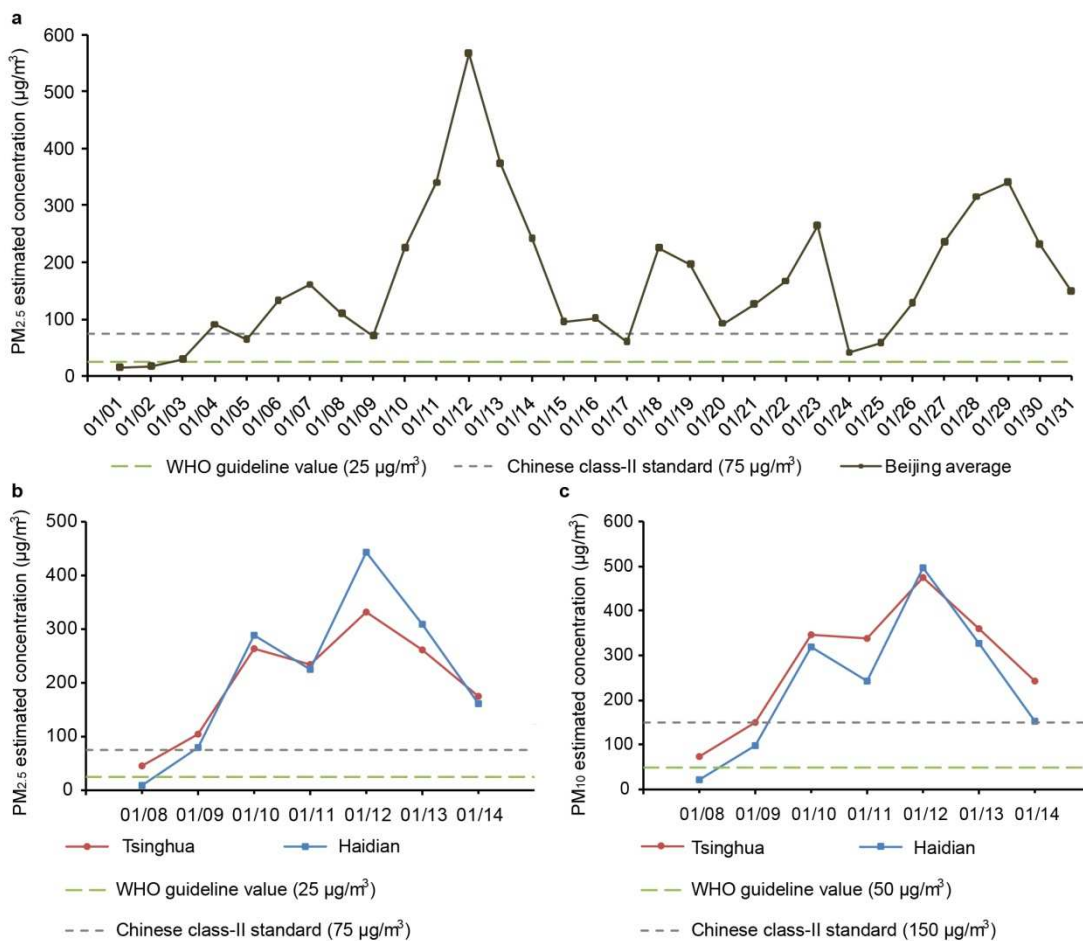

**Figure S7.** PM<sub>2.5</sub> and PM<sub>10</sub> concentration of Beijing, Haidian district and Tsinghua monitoring site.  
 a) Average PM<sub>2.5</sub> concentration in Beijing in January 2013. b) PM<sub>2.5</sub> and c) PM<sub>10</sub> concentrations of Tsinghua monitoring site and Haidian district during January 8-14, 2013.



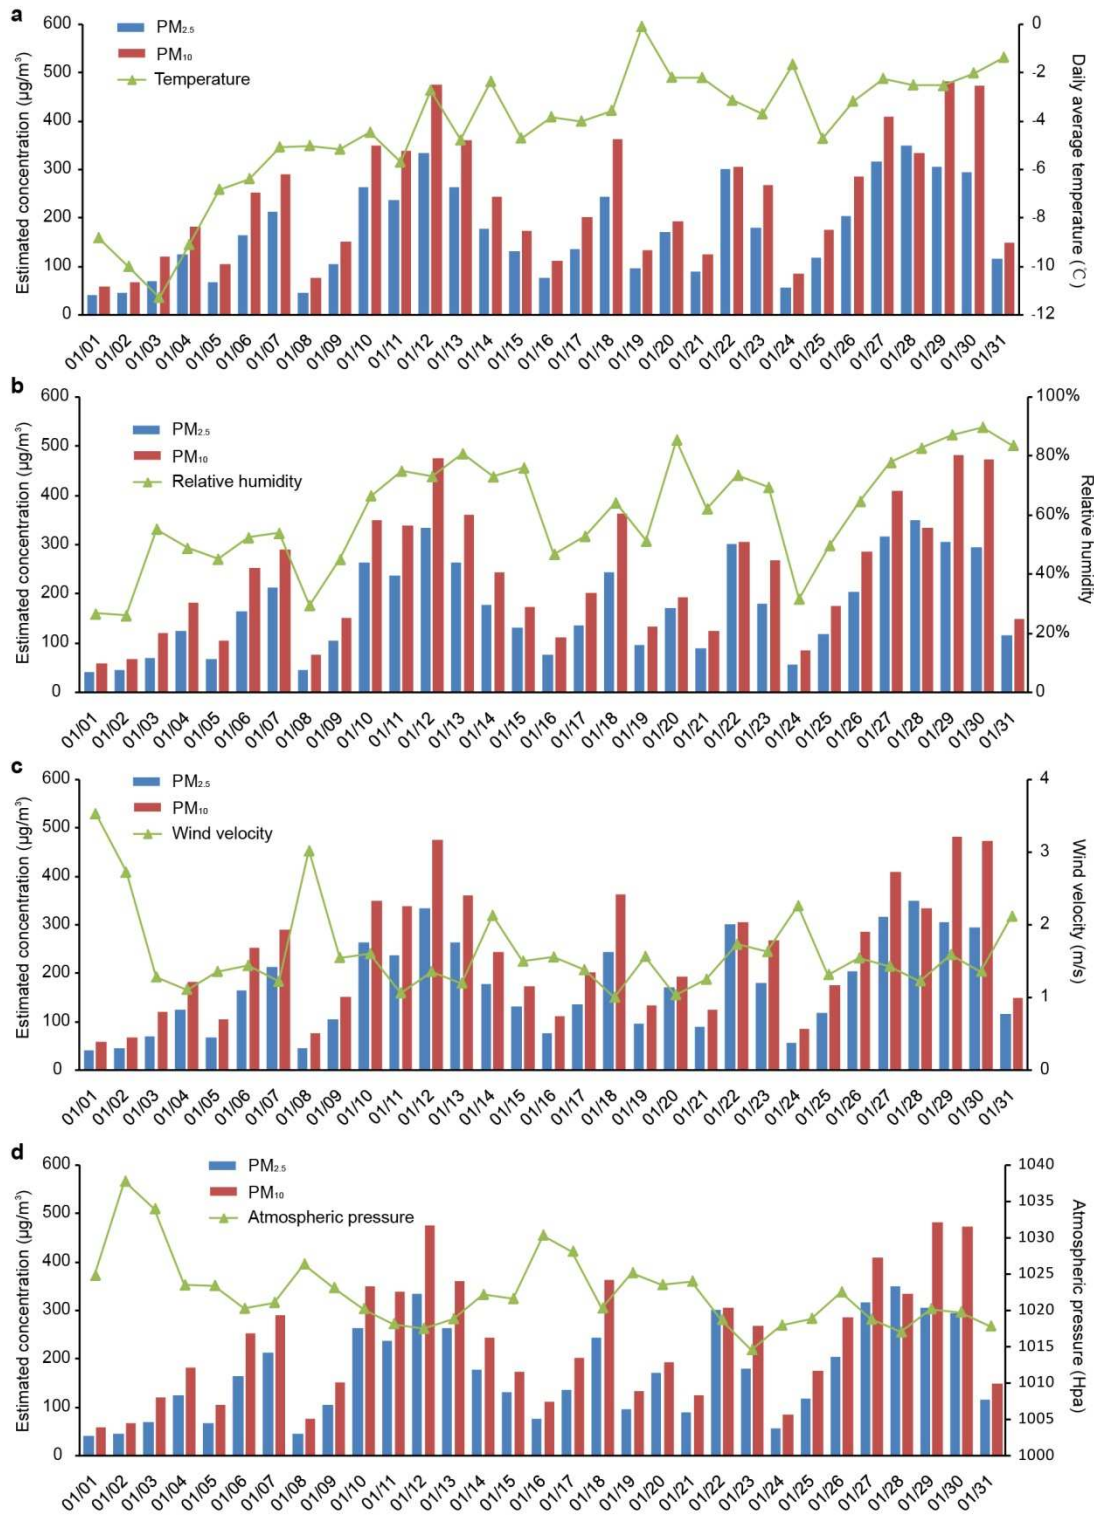

**Figure S8.** Meteorological data plotted with PM<sub>2.5</sub> and PM<sub>10</sub> concentration in January 2013.

a) Daily average temperature, b) Relative humidity, c) Wind velocity and d) Atmospheric pressure were plotted in green lines, PM<sub>2.5</sub> concentration was plotted in blue bars and PM<sub>10</sub> concentration was plotted in red bars.



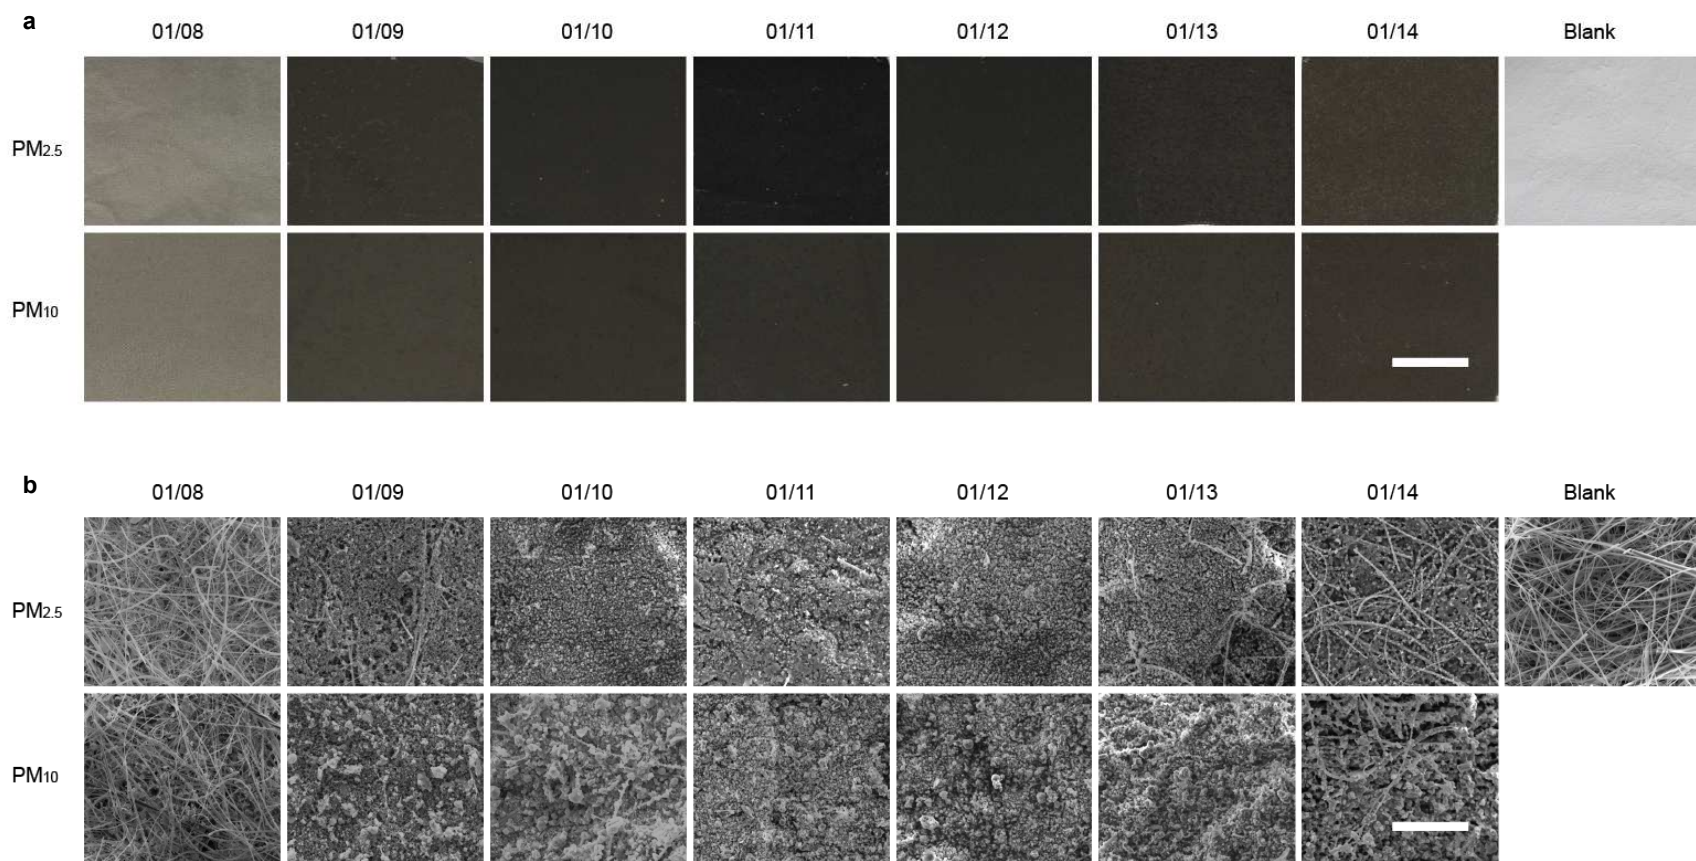

**Figure S9.** Filter coloration and SEM images of PM<sub>2.5</sub> and PM<sub>10</sub> samples.

**a)** Filter coloration (Scale bar, 2 cm) and **b)** SEM images (Scale bar, 50  $\mu$ m) of PM<sub>2.5</sub> and PM<sub>10</sub> samples collected on the Tissuquartz filters during January 8-14, 2013.

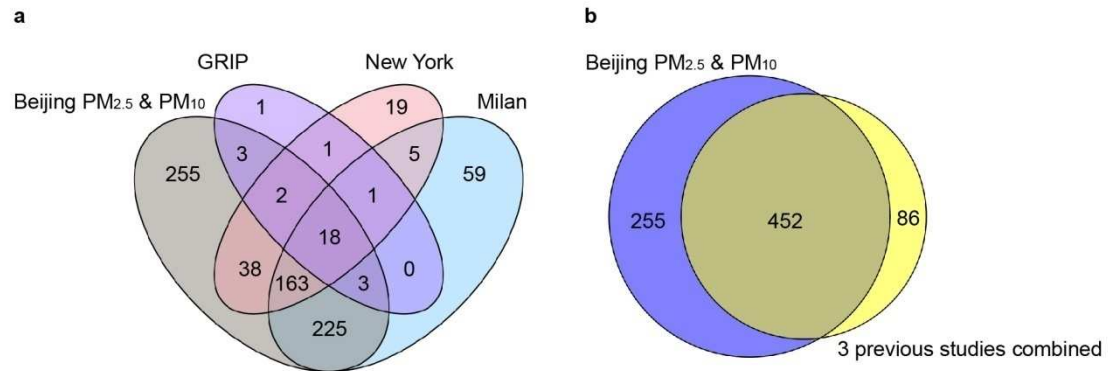

**Figure S10.** Number of overlapping airborne microbes at the genus level between Tsinghua PM study and three previous studies.  
**a)** Venn diagram of overlapping airborne microbes at the genus level between 4 studies. **b)** Venn diagram of overlapping airborne microbes at the genus level between Tsinghua PM study and three previous studies<sup>5-7</sup>.

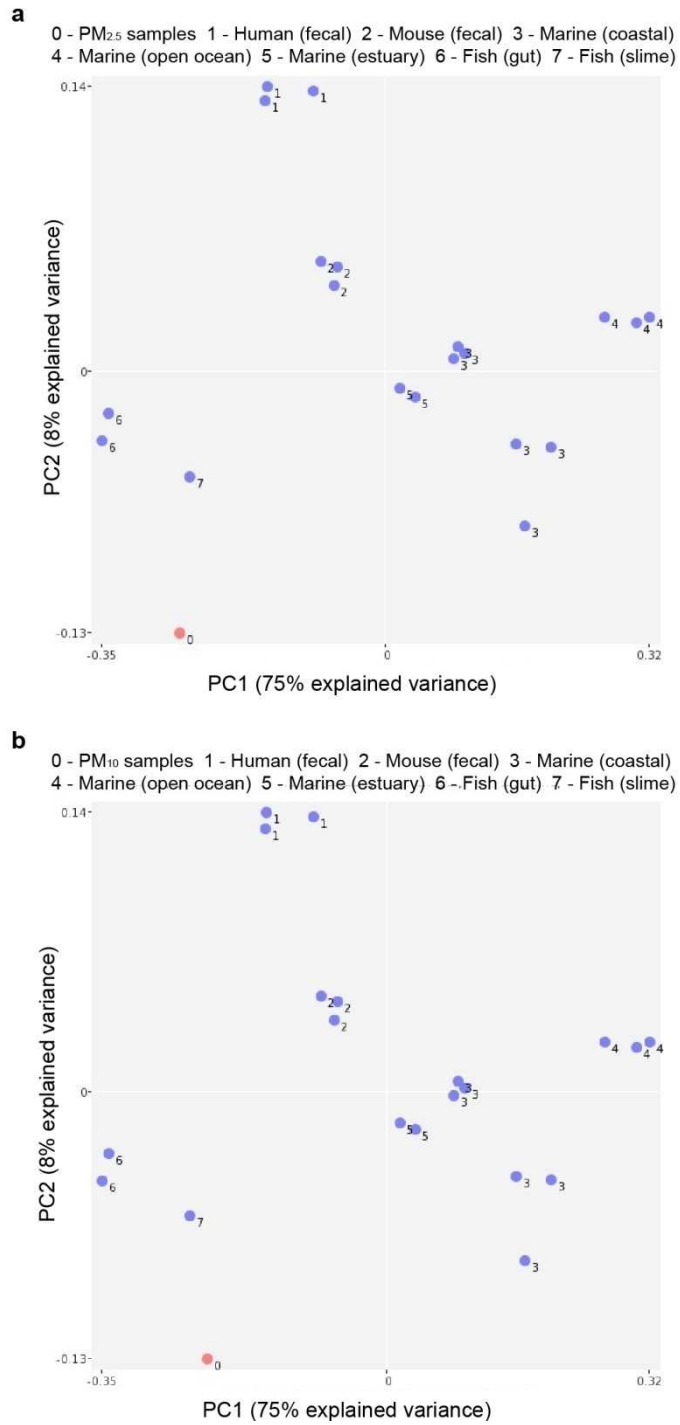

**Figure S11.** Principle component analysis of dinucleotide frequency of pooled PM<sub>2.5</sub> samples and PM<sub>10</sub> samples. Principle component analysis of dinucleotide frequency of **a**) PM<sub>2.5</sub> samples and **b**) PM<sub>10</sub> samples (represented by a red dot, respectively) compared with other metagenomic studies (calculated by PRINSEQ<sup>8</sup>).

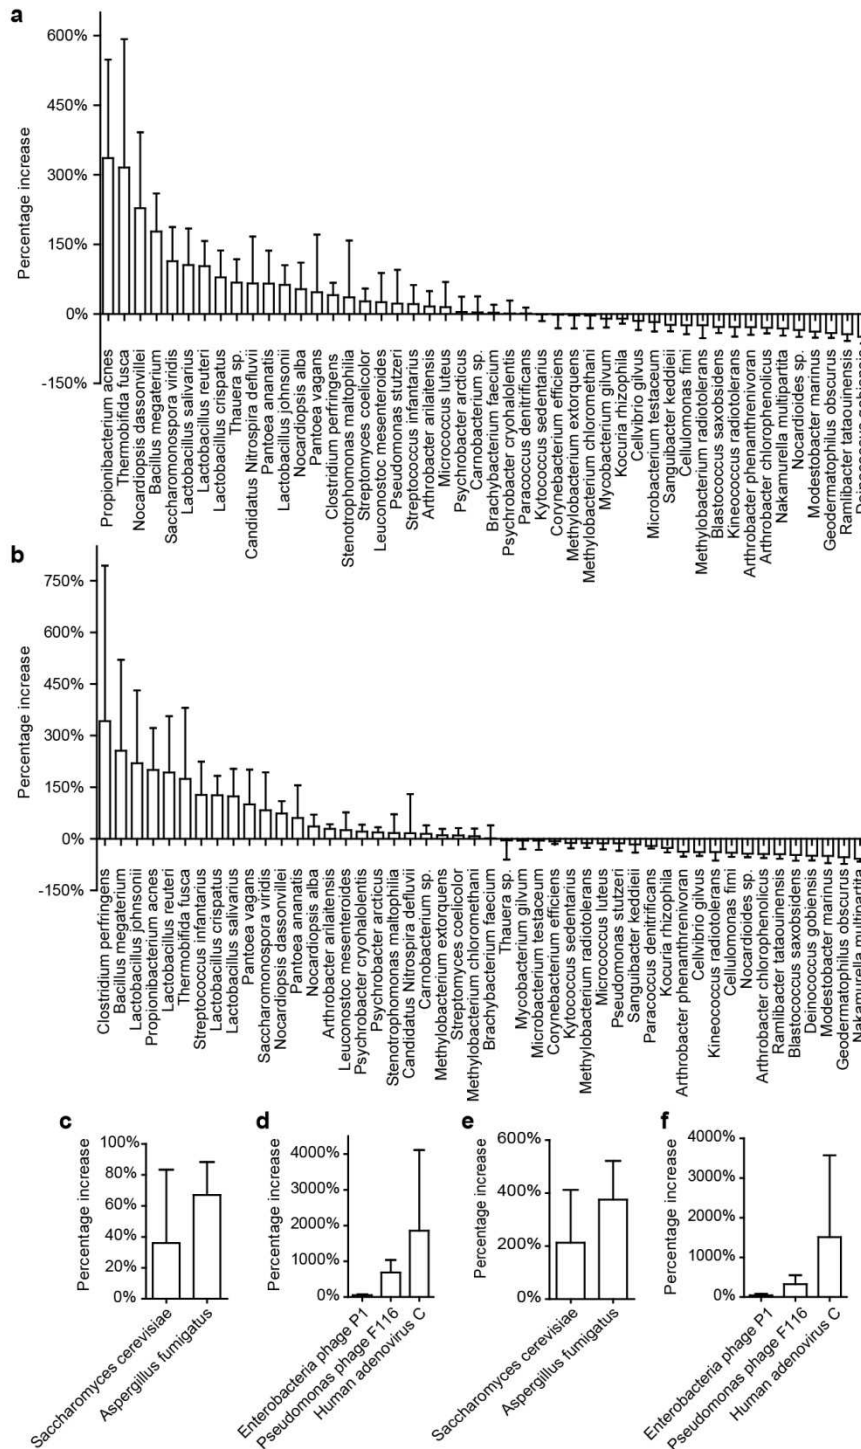

**Figure S12.** Percentage increase of 53 common species identified from PM samples. Percentage increase of 48 most common bacterial, 2 fungal and 3 viral species from PM<sub>2.5</sub> (**a, c, d**) and PM<sub>10</sub> (**b, e, f**) samples during the last 5 sampling days compared to the first 2 days. Error bars represent S.D. (n=5).

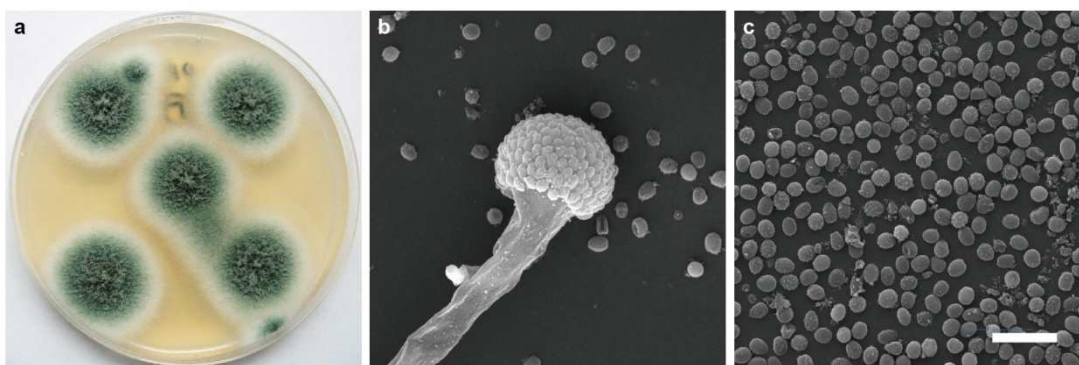

**Figure S13.** Images of cultured *Aspergillus fumigatus* from PM samples. *Aspergillus fumigatus* colonies on **a)** Potato-Sugar-Agar plate and SEM pictures of the **b)** sporangium and **c,** spores. Scale bar, 10  $\mu\text{m}$ .

**Table S1.** Summary of sequencing data.

|                   | Sampling date | DNA quantities<br>for library<br>preparation (ng) | Hiseq data     |                 |                         |                        | Miseq data         |                         |                        |
|-------------------|---------------|---------------------------------------------------|----------------|-----------------|-------------------------|------------------------|--------------------|-------------------------|------------------------|
|                   |               |                                                   | Index sequence | Number of reads | Number of bases<br>(bp) | Read<br>length<br>(bp) | Number of<br>reads | Number of<br>bases (bp) | Read<br>length<br>(bp) |
| PM <sub>2.5</sub> | 01/08         | 5                                                 | CGTGAT         | 89,678,529      | 8,071,067,610           | 90                     | NA*                | NA*                     | NA*                    |
|                   | 01/09         | 5                                                 | GCCTAA         | 71,393,580      | 6,425,422,200           | 90                     | 2,530,054          | 635,043,554             | 250                    |
|                   | 01/10         | 5                                                 | CACTGT         | 62,009,579      | 5,580,862,110           | 90                     | 3,446,228          | 865,003,228             | 250                    |
|                   | 01/11         | 5                                                 | GATCTG         | 77,104,586      | 6,939,412,740           | 90                     | 3,256,656          | 817,420,656             | 250                    |
|                   | 01/12         | 5                                                 | CGTGAT         | 71,059,996      | 6,395,399,640           | 90                     | 3,959,272          | 993,777,272             | 250                    |
|                   | 01/13         | 3.84                                              | GTAGCC         | 79,351,275      | 7,141,614,750           | 90                     | 2,718,562          | 682,359,062             | 250                    |
|                   | 01/14         | 4.70                                              | CTGATC         | 49,053,564      | 4,414,820,760           | 90                     | 2,885,166          | 724,176,666             | 250                    |
| PM <sub>10</sub>  | 01/08         | 5                                                 | GATCTG         | 101,941,930     | 9,174,773,700           | 90                     | NA*                | NA*                     | NA*                    |
|                   | 01/09         | 5                                                 | TGGTCA         | 72,683,317      | 6,541,498,530           | 90                     | 2,899,646          | 727,811,146             | 250                    |
|                   | 01/10         | 5                                                 | ATTGGC         | 85,462,603      | 7,691,634,270           | 90                     | 3,205,264          | 804,521,264             | 250                    |
|                   | 01/11         | 5                                                 | TCAAGT         | 78,209,164      | 7,038,824,760           | 90                     | 2,115,626          | 531,022,126             | 250                    |
|                   | 01/12         | 4.96                                              | TACAAG         | 78,721,109      | 7,084,899,810           | 90                     | 3,198,546          | 802,835,046             | 250                    |
|                   | 01/13         | 5                                                 | ACATCG         | 87,108,549      | 7,839,769,410           | 90                     | 3,969,610          | 996,372,110             | 250                    |
|                   | 01/14         | 5                                                 | AAGCTA         | 85,878,005      | 7,729,020,450           | 90                     | 3,499,914          | 878,478,414             | 250                    |
| Total clean data  |               |                                                   |                | 1,089,655,786   | 98,069,020,740          |                        | 32,646,774         | 8,194,340,274           |                        |
| Total raw data    |               |                                                   |                | 1,192,904,738   | 107,361,426,420         |                        | 37,684,544         | 9,458,820,544           |                        |

\*Sequencing not performed.

**Table S2.** Genome coverage of the 48 most common bacterial, 2 fungal, and 3 viral species.

| Organism | Species                                | Genome size (Mb) | Coverage          |       |       |       |       |       |       |                  |       |       |       |       |       |       |
|----------|----------------------------------------|------------------|-------------------|-------|-------|-------|-------|-------|-------|------------------|-------|-------|-------|-------|-------|-------|
|          |                                        |                  | PM <sub>2.5</sub> |       |       |       |       |       |       | PM <sub>10</sub> |       |       |       |       |       |       |
|          |                                        |                  | 01/08             | 01/09 | 01/10 | 01/11 | 01/12 | 01/13 | 01/14 | 01/08            | 01/09 | 01/10 | 01/11 | 01/12 | 01/13 | 01/14 |
| Bacteria | <i>Geodermatophilus obscurus</i>       | 5.3              | 54.0%             | 41.0% | 41.0% | 43.0% | 40.0% | 45.0% | 35.0% | 58.0%            | 43.0% | 34.0% | 49.0% | 39.0% | 39.0% | 25.0% |
|          | <i>Modestobacter marinus</i>           | 5.6              | 46.0%             | 39.0% | 33.0% | 36.0% | 28.0% | 41.0% | 28.0% | 42.0%            | 30.0% | 22.0% | 38.0% | 24.0% | 29.0% | 17.0% |
|          | <i>Blastococcus saxobsidens</i>        | 4.9              | 32.0%             | 27.0% | 28.0% | 27.0% | 25.0% | 33.0% | 25.0% | 33.0%            | 29.0% | 23.0% | 29.0% | 24.0% | 27.0% | 17.0% |
|          | <i>Kocuria rhizophila</i>              | 2.7              | 14.0%             | 17.0% | 16.0% | 17.0% | 17.0% | 22.0% | 12.0% | 17.0%            | 18.0% | 15.0% | 17.0% | 16.0% | 18.0% | 14.0% |
|          | <i>Micrococcus luteus</i>              | 2.5              | 13.0%             | 26.0% | 18.0% | 20.0% | 53.0% | 25.0% | 14.0% | 24.0%            | 19.0% | 20.0% | 25.0% | 26.0% | 27.0% | 17.0% |
|          | <i>Candidatus Nitrospira defluvii</i>  | 4.3              | 11.0%             | 34.0% | 39.0% | 40.0% | 60.0% | 12.0% | 23.0% | 19.0%            | 34.0% | 12.0% | 29.0% | 58.0% | 26.0% | 10.0% |
|          | <i>Methylobacterium radiotolerans</i>  | 6.1              | 29.0%             | 26.0% | 20.0% | 26.0% | 23.0% | 22.0% | 28.0% | 25.0%            | 21.0% | 23.0% | 21.0% | 19.0% | 29.0% | 16.0% |
|          | <i>Propionibacterium acnes</i>         | 2.6              | 7.1%              | 13.0% | 23.0% | 20.0% | 42.0% | 61.0% | 44.0% | 10.0%            | 14.0% | 17.0% | 27.0% | 28.0% | 45.0% | 37.0% |
|          | <i>Thermobifida fusca</i>              | 3.6              | 3.7%              | 13.0% | 57.0% | 15.0% | 35.0% | 35.0% | 23.0% | 16.0%            | 31.0% | 47.0% | 31.0% | 80.0% | 35.0% | 47.0% |
|          | <i>Nocardioides</i> sp.                | 5.0              | 12.0%             | 11.0% | 10.0% | 10.0% | 9.4%  | 11.0% | 7.5%  | 15.0%            | 13.0% | 12.0% | 12.0% | 11.0% | 12.0% | 7.9%  |
|          | <i>Nocardiopsis dassonvillei</i>       | 6.5              | 4.4%              | 10.9% | 36.0% | 13.7% | 20.6% | 45.7% | 18.2% | 14.6%            | 28.4% | 46.1% | 28.1% | 33.6% | 39.4% | 30.8% |
|          | <i>Brachybacterium faecium</i>         | 3.6              | 9.3%              | 14.0% | 16.0% | 13.0% | 15.0% | 18.0% | 9.5%  | 15.0%            | 31.0% | 28.0% | 23.0% | 19.0% | 42.0% | 12.0% |
|          | <i>Arthrobacter phenanthrenivorans</i> | 4.3              | 18.0%             | 15.0% | 15.0% | 15.0% | 12.0% | 14.0% | 8.1%  | 26.0%            | 21.0% | 20.0% | 20.0% | 16.0% | 21.0% | 11.0% |
|          | <i>Cellvibrio gilvus</i>               | 3.5              | 8.6%              | 7.8%  | 8.2%  | 7.9%  | 6.6%  | 15.0% | 5.8%  | 9.2%             | 8.4%  | 7.5%  | 7.4%  | 6.6%  | 7.4%  | 4.9%  |
|          | <i>Carnobacterium</i> sp.              | 2.6              | 18.0%             | 16.0% | 19.0% | 16.0% | 25.0% | 19.0% | 8.6%  | 25.0%            | 20.0% | 26.0% | 22.0% | 27.0% | 23.0% | 25.0% |
|          | <i>Microbacterium testaceum</i>        | 4.0              | 8.0%              | 12.0% | 10.0% | 11.0% | 8.9%  | 11.0% | 6.2%  | 10.0%            | 12.0% | 15.0% | 11.0% | 8.8%  | 18.0% | 8.6%  |
|          | <i>Paracoccus denitrificans</i>        | 4.6              | 8.1%              | 8.0%  | 8.3%  | 8.3%  | 8.3%  | 9.5%  | 6.7%  | 9.7%             | 8.6%  | 8.7%  | 8.4%  | 8.1%  | 9.2%  | 6.7%  |
|          | <i>Kytococcus sedentarius</i>          | 2.8              | 6.5%              | 7.8%  | 9.2%  | 7.3%  | 10.0% | 9.6%  | 5.9%  | 10.0%            | 10.0% | 10.0% | 12.0% | 12.0% | 14.0% | 7.7%  |
|          | <i>Pantoea vagans</i>                  | 4.0              | 10.0%             | 12.0% | 32.0% | 16.0% | 14.0% | 9.0%  | 5.0%  | 8.8%             | 20.0% | 46.0% | 23.0% | 17.0% | 27.0% | 20.0% |
|          | <i>Pseudomonas stutzeri</i>            | 4.7              | 12.0%             | 13.0% | 15.0% | 9.4%  | 12.0% | 12.0% | 25.0% | 17.0%            | 18.0% | 19.0% | 15.0% | 15.0% | 21.0% | 7.4%  |
|          | <i>Kineococcus radiotolerans</i>       | 4.8              | 10.0%             | 8.8%  | 8.4%  | 9.9%  | 6.1%  | 6.4%  | 7.9%  | 11.0%            | 8.2%  | 6.1%  | 11.0% | 5.1%  | 7.2%  | 3.6%  |
|          | <i>Sanguibacter keddieii</i>           | 4.3              | 9.5%              | 10.0% | 8.1%  | 8.1%  | 7.7%  | 12.0% | 5.9%  | 9.4%             | 11.0% | 19.0% | 8.9%  | 9.4%  | 11.0% | 6.7%  |
|          | <i>Thauera</i> sp.                     | 4.5              | 6.3%              | 11.0% | 12.0% | 17.0% | 23.0% | 13.0% | 11.0% | 8.9%             | 18.0% | 10.0% | 16.0% | 23.0% | 13.0% | 5.4%  |
|          | <i>Pantoea ananatis</i>                | 4.7              | 4.2%              | 15.0% | 16.0% | 13.0% | 26.0% | 16.0% | 6.6%  | 13.0%            | 35.0% | 57.0% | 16.0% | 18.0% | 62.0% | 31.0% |
|          | <i>Cellulomonas fimi</i>               | 4.3              | 8.6%              | 6.9%  | 7.1%  | 7.5%  | 5.6%  | 7.5%  | 5.1%  | 8.7%             | 7.7%  | 6.2%  | 6.9%  | 6.0%  | 6.9%  | 4.4%  |
|          | <i>Lactobacillus johnsonii</i>         | 2.0              | 5.2%              | 13.0% | 13.0% | 12.0% | 22.0% | 21.0% | 10.0% | 8.5%             | 23.0% | 37.0% | 28.0% | 23.0% | 49.0% | 58.0% |
|          | <i>Deinococcus gobiensis</i>           | 3.1              | 20.0%             | 14.0% | 11.0% | 12.0% | 9.9%  | 8.2%  | 7.3%  | 19.0%            | 8.1%  | 7.6%  | 9.6%  | 6.0%  | 10.0% | 4.2%  |
|          | <i>Lactobacillus crispatus</i>         | 2.0              | 5.2%              | 12.0% | 14.0% | 12.0% | 23.0% | 18.0% | 8.1%  | 8.6%             | 25.0% | 37.0% | 30.0% | 24.0% | 50.0% | 32.0% |
|          | <i>Lactobacillus salivarius</i>        | 1.8              | 5.0%              | 9.1%  | 13.0% | 10.0% | 22.0% | 21.0% | 7.0%  | 6.7%             | 25.0% | 35.0% | 28.0% | 21.0% | 51.0% | 33.0% |

|        |                                          |       |       |       |       |       |       |       |       |       |       |       |       |       |       |       |
|--------|------------------------------------------|-------|-------|-------|-------|-------|-------|-------|-------|-------|-------|-------|-------|-------|-------|-------|
|        | <i>Lactobacillus reuteri</i>             | 2.3   | 3.2%  | 11.0% | 12.0% | 11.0% | 20.0% | 19.0% | 10.0% | 8.0%  | 25.0% | 37.0% | 28.0% | 25.0% | 50.0% | 51.0% |
|        | <i>Clostridium perfringens</i>           | 3.3   | 9.3%  | 9.1%  | 12.0% | 12.0% | 15.0% | 12.0% | 14.0% | 9.1%  | 9.9%  | 15.0% | 18.0% | 26.0% | 24.0% | 57.0% |
|        | <i>Bacillus megaterium</i>               | 5.1   | 3.5%  | 6.3%  | 8.5%  | 9.9%  | 16.0% | 18.0% | 16.0% | 7.8%  | 9.7%  | 19.0% | 12.0% | 30.0% | 20.0% | 42.0% |
|        | <i>Psychrobacter cryohalolentis</i>      | 3.1   | 9.2%  | 7.8%  | 9.1%  | 9.4%  | 12.0% | 9.6%  | 5.2%  | 12.0% | 12.0% | 14.0% | 14.0% | 17.0% | 17.0% | 12.0% |
|        | <i>Arthrobacter arilaitensis</i>         | 3.9   | 5.2%  | 11.0% | 9.1%  | 8.4%  | 9.7%  | 12.0% | 4.7%  | 9.2%  | 15.0% | 19.0% | 14.0% | 13.0% | 21.0% | 12.0% |
|        | <i>Ramlibacter tataouinensis</i>         | 4.1   | 12.0% | 9.8%  | 6.8%  | 7.8%  | 5.3%  | 8.1%  | 7.5%  | 11.0% | 8.7%  | 6.8%  | 7.8%  | 6.2%  | 8.1%  | 3.7%  |
|        | <i>Nakamurella multipartita</i>          | 6.1   | 12.0% | 8.1%  | 6.0%  | 6.5%  | 9.9%  | 6.0%  | 8.6%  | 12.0% | 11.0% | 5.6%  | 5.7%  | 5.3%  | 5.0%  | 3.6%  |
|        | <i>Streptococcus infantarius</i>         | 2.0   | 6.0%  | 9.8%  | 8.0%  | 8.2%  | 13.0% | 17.0% | 6.2%  | 7.9%  | 12.0% | 18.0% | 15.0% | 13.0% | 21.0% | 22.0% |
|        | <i>Stenotrophomonas maltophilia</i>      | 4.9   | 6.5%  | 7.2%  | 23.0% | 5.7%  | 5.4%  | 6.9%  | 6.6%  | 6.0%  | 8.6%  | 15.0% | 9.9%  | 6.1%  | 8.2%  | 4.2%  |
|        | <i>Arthrobacter chlorophenolicus</i>     | 4.4   | 8.3%  | 7.7%  | 6.4%  | 7.0%  | 5.5%  | 6.5%  | 6.6%  | 14.0% | 14.0% | 11.0% | 8.9%  | 8.7%  | 10.0% | 5.1%  |
|        | <i>Mycobacterium gilvum</i>              | 5.6   | 8.8%  | 8.9%  | 7.4%  | 6.9%  | 9.9%  | 12.0% | 5.7%  | 12.0% | 10.0% | 8.2%  | 11.0% | 9.6%  | 11.0% | 9.5%  |
|        | <i>Methylobacterium extorquens</i>       | 6.0   | 9.1%  | 8.1%  | 7.3%  | 9.4%  | 6.5%  | 8.7%  | 9.8%  | 7.5%  | 6.6%  | 9.8%  | 8.1%  | 7.9%  | 8.5%  | 5.0%  |
|        | <i>Methylobacterium chloromethanicum</i> | 5.8   | 8.7%  | 7.9%  | 7.7%  | 9.3%  | 6.3%  | 8.4%  | 9.0%  | 7.6%  | 6.6%  | 9.9%  | 8.0%  | 7.8%  | 8.1%  | 4.5%  |
|        | <i>Corynebacterium efficiens</i>         | 3.1   | 6.1%  | 8.8%  | 9.8%  | 9.3%  | 8.5%  | 9.2%  | 3.9%  | 14.0% | 13.0% | 15.0% | 12.0% | 11.0% | 16.0% | 11.0% |
|        | <i>Saccharomonospora viridis</i>         | 4.3   | 2.1%  | 4.7%  | 11.0% | 5.0%  | 9.2%  | 13.0% | 5.2%  | 8.3%  | 13.0% | 16.0% | 8.8%  | 26.0% | 13.0% | 26.0% |
|        | <i>Nocardiopsis alba</i>                 | 5.8   | 2.0%  | 5.8%  | 9.5%  | 8.1%  | 5.3%  | 8.9%  | 3.4%  | 5.3%  | 11.0% | 16.0% | 12.0% | 10.0% | 16.0% | 5.9%  |
|        | <i>Psychrobacter arcticus</i>            | 2.7   | 5.0%  | 3.9%  | 4.6%  | 5.2%  | 6.1%  | 5.0%  | 2.4%  | 6.6%  | 5.7%  | 7.2%  | 6.2%  | 7.5%  | 8.0%  | 6.1%  |
|        | <i>Leuconostoc mesenteroides</i>         | 2.0   | 5.5%  | 3.5%  | 4.6%  | 4.5%  | 11.0% | 5.2%  | 3.6%  | 7.1%  | 5.9%  | 6.1%  | 6.5%  | 8.2%  | 7.1%  | 11.0% |
|        | <i>Streptomyces coelicolor</i>           | 8.7   | 2.3%  | 3.9%  | 5.5%  | 3.6%  | 4.9%  | 7.1%  | 3.3%  | 5.1%  | 6.2%  | 6.4%  | 5.3%  | 8.1%  | 8.0%  | 5.8%  |
| Fungus | <i>Aspergillus fumigatus</i> Af293       | 29.4  | 0.7%  | 1.0%  | 8.9%  | 5.0%  | 13.4% | 11.2% | 7.6%  | 4.7%  | 9.0%  | 27.9% | 27.8% | 31.7% | 22.6% | 31.7% |
|        | <i>Saccharomyces cerevisiae</i> S288c    | 12.1  | 0.2%  | 0.5%  | 1.4%  | 0.9%  | 5.9%  | 1.2%  | 0.6%  | 1.1%  | 1.4%  | 2.2%  | 1.8%  | 4.2%  | 3.5%  | 6.2%  |
| Virus  | Human adenovirus C <sub>1</sub>          | 0.036 | 2.4%  | 3.6%  | 4.5%  | 7.7%  | 9.8%  | 9.3%  | 12.0% | 2.9%  | 3.7%  | 9.6%  | 4.8%  | 4.0%  | 8.8%  | 8.0%  |
|        | <i>Pseudomonas</i> phage F116            | 0.065 | 5.4%  | 8.0%  | 18.0% | 22.0% | 34.0% | 35.0% | 27.0% | 0.7%  | 5.9%  | 4.7%  | 13.0% | 8.1%  | 20.0% | 16.0% |
|        | Enterobacteria phage P1                  | 0.095 | 1.1%  | 1.5%  | 1.9%  | 1.9%  | 2.5%  | 2.1%  | 1.9%  | 1.3%  | 2.2%  | 2.8%  | 2.2%  | 2.0%  | 3.2%  | 2.6%  |



**Table S3.** Genome-size-normalized relative abundance of the 48 most common bacterial, 2 fungal, and 3 viral species.

| Organism                        | Species                                | Genome size (Mb) | Relative abundance |        |        |        |       |        |        |                  |        |       |        |        |       |       |
|---------------------------------|----------------------------------------|------------------|--------------------|--------|--------|--------|-------|--------|--------|------------------|--------|-------|--------|--------|-------|-------|
|                                 |                                        |                  | PM <sub>2.5</sub>  |        |        |        |       |        |        | PM <sub>10</sub> |        |       |        |        |       |       |
|                                 |                                        |                  | 01/08              | 01/09  | 01/10  | 01/11  | 01/12 | 01/13  | 01/14  | 01/08            | 01/09  | 01/10 | 01/11  | 01/12  | 01/13 | 01/14 |
| Bacteria                        | <i>Geodermatophilus obscurus</i>       | 5.3              | 24.99%             | 16.34% | 12.57% | 15.08% | 9.49% | 12.66% | 10.73% | 21.81%           | 12.64% | 6.12% | 13.51% | 8.20%  | 7.78% | 4.47% |
|                                 | <i>Modestobacter marinus</i>           | 5.6              | 16.79%             | 14.07% | 9.64%  | 12.11% | 6.60% | 10.40% | 8.90%  | 13.83%           | 9.45%  | 4.51% | 9.70%  | 5.46%  | 5.97% | 3.51% |
|                                 | <i>Blastococcus saxosidens</i>         | 4.9              | 11.05%             | 9.25%  | 7.49%  | 8.37%  | 5.37% | 8.50%  | 6.65%  | 10.21%           | 8.15%  | 4.10% | 7.21%  | 4.97%  | 5.18% | 3.02% |
|                                 | <i>Kocuria rhizophila</i>              | 2.7              | 5.59%              | 6.87%  | 5.74%  | 6.60%  | 5.20% | 5.61%  | 4.85%  | 6.09%            | 5.93%  | 3.85% | 5.57%  | 4.84%  | 4.30% | 3.58% |
|                                 | <i>Micrococcus luteus</i>              | 2.5              | 2.94%              | 4.71%  | 3.48%  | 4.17%  | 7.98% | 3.44%  | 2.80%  | 4.03%            | 3.75%  | 2.79% | 4.18%  | 3.94%  | 3.47% | 2.61% |
|                                 | <i>Candidatus Nitrospira defluvii</i>  | 4.3              | 0.80%              | 3.15%  | 3.72%  | 3.83%  | 6.02% | 0.71%  | 2.07%  | 1.15%            | 2.69%  | 0.75% | 2.24%  | 5.98%  | 1.46% | 0.79% |
|                                 | <i>Methylobacterium radiotolerans</i>  | 6.1              | 3.56%              | 3.08%  | 1.94%  | 2.97%  | 2.05% | 1.66%  | 3.92%  | 2.14%            | 1.79%  | 1.74% | 1.74%  | 1.60%  | 2.17% | 1.40% |
|                                 | <i>Propionibacterium acnes</i>         | 2.6              | 0.48%              | 1.04%  | 1.84%  | 1.61%  | 3.27% | 5.21%  | 4.62%  | 0.61%            | 0.92%  | 1.02% | 1.92%  | 2.23%  | 2.76% | 3.50% |
|                                 | <i>Thermobifida fusca</i>              | 3.6              | 0.29%              | 1.10%  | 6.18%  | 1.19%  | 2.71% | 2.29%  | 2.08%  | 0.95%            | 2.43%  | 3.53% | 2.35%  | 10.56% | 1.95% | 4.76% |
|                                 | <i>Nocardioides</i> sp.                | 5.0              | 2.78%              | 2.55%  | 1.99%  | 2.22%  | 1.47% | 1.79%  | 1.23%  | 3.62%            | 2.77%  | 1.93% | 2.17%  | 1.92%  | 1.81% | 1.29% |
|                                 | <i>Nocardiopsis dassonvillei</i>       | 6.5              | 0.41%              | 1.01%  | 3.43%  | 1.21%  | 1.51% | 3.72%  | 1.76%  | 1.02%            | 2.43%  | 3.97% | 2.31%  | 2.86%  | 2.74% | 3.13% |
|                                 | <i>Brachybacterium faecium</i>         | 3.6              | 1.14%              | 1.90%  | 1.81%  | 1.67%  | 1.51% | 1.68%  | 1.13%  | 1.60%            | 3.33%  | 2.83% | 2.47%  | 2.01%  | 3.85% | 1.37% |
|                                 | <i>Arthrobacter phenanthrenivorans</i> | 4.3              | 1.98%              | 1.79%  | 1.60%  | 1.68%  | 1.24% | 1.28%  | 0.91%  | 2.99%            | 2.24%  | 1.85% | 2.09%  | 1.51%  | 1.66% | 1.12% |
|                                 | <i>Cellvibrio gilvus</i>               | 3.5              | 1.69%              | 1.64%  | 1.50%  | 1.66%  | 1.07% | 1.78%  | 1.08%  | 1.78%            | 1.53%  | 1.01% | 1.31%  | 1.04%  | 1.00% | 0.77% |
|                                 | <i>Carnobacterium</i> sp.              | 2.6              | 1.40%              | 1.43%  | 1.71%  | 1.43%  | 2.07% | 1.35%  | 0.77%  | 1.90%            | 1.59%  | 1.95% | 1.81%  | 2.43%  | 1.41% | 2.40% |
|                                 | <i>Microbacterium testaceum</i>        | 4.0              | 1.23%              | 1.82%  | 1.39%  | 1.64%  | 1.09% | 1.33%  | 0.83%  | 1.44%            | 1.65%  | 1.79% | 1.42%  | 1.11%  | 1.99% | 1.02% |
|                                 | <i>Paracoccus denitrificans</i>        | 4.6              | 1.16%              | 1.22%  | 1.31%  | 1.34%  | 1.10% | 1.26%  | 0.98%  | 1.32%            | 1.21%  | 0.99% | 1.11%  | 1.04%  | 1.01% | 0.86% |
|                                 | <i>Kytococcus sedentarius</i>          | 2.8              | 1.08%              | 1.26%  | 1.31%  | 1.20%  | 1.28% | 1.12%  | 0.88%  | 1.36%            | 1.33%  | 1.03% | 1.37%  | 1.40%  | 1.20% | 0.92% |
|                                 | <i>Pantoea vagans</i>                  | 4.0              | 0.76%              | 0.94%  | 3.04%  | 1.32%  | 0.95% | 0.54%  | 0.41%  | 0.52%            | 1.44%  | 3.71% | 1.60%  | 1.20%  | 1.67% | 1.63% |
|                                 | <i>Pseudomonas stutzeri</i>            | 4.7              | 0.85%              | 1.10%  | 1.23%  | 0.77%  | 0.80% | 0.76%  | 2.42%  | 0.99%            | 1.30%  | 1.13% | 1.05%  | 1.10%  | 1.16% | 0.56% |
|                                 | <i>Kineococcus radiotolerans</i>       | 4.8              | 1.41%              | 1.31%  | 1.13%  | 1.36%  | 0.68% | 0.75%  | 0.94%  | 1.37%            | 1.09%  | 0.67% | 1.27%  | 0.67%  | 0.72% | 0.45% |
|                                 | <i>Sanguibacter keddieii</i>           | 4.3              | 1.23%              | 1.36%  | 1.05%  | 1.17%  | 0.81% | 1.15%  | 0.79%  | 1.26%            | 1.22%  | 1.52% | 1.05%  | 0.97%  | 0.94% | 0.71% |
|                                 | <i>Thauera</i> sp.                     | 4.5              | 0.51%              | 0.92%  | 0.98%  | 1.46%  | 1.68% | 0.85%  | 0.99%  | 0.57%            | 1.40%  | 0.62% | 1.14%  | 1.79%  | 0.75% | 0.41% |
|                                 | <i>Pantoea ananatis</i>                | 4.7              | 0.28%              | 1.13%  | 1.34%  | 1.07%  | 1.91% | 0.99%  | 0.54%  | 0.79%            | 2.77%  | 4.59% | 1.14%  | 1.29%  | 4.57% | 2.75% |
|                                 | <i>Cellulomonas fimi</i>               | 4.3              | 1.32%              | 1.16%  | 1.05%  | 1.28%  | 0.71% | 0.94%  | 0.72%  | 1.39%            | 1.16%  | 0.75% | 0.98%  | 0.76%  | 0.75% | 0.55% |
|                                 | <i>Lactobacillus johnsonii</i>         | 2.0              | 0.35%              | 1.06%  | 1.06%  | 0.97%  | 1.56% | 1.35%  | 0.82%  | 0.46%            | 1.80%  | 2.79% | 2.15%  | 1.66%  | 3.85% | 7.65% |
|                                 | <i>Deinococcus gobiensis</i>           | 3.1              | 1.84%              | 1.28%  | 1.00%  | 1.06%  | 0.66% | 0.54%  | 0.71%  | 1.39%            | 0.59%  | 0.46% | 0.68%  | 0.43%  | 0.59% | 0.34% |
|                                 | <i>Lactobacillus crispatus</i>         | 2.0              | 0.35%              | 0.90%  | 1.17%  | 1.02%  | 1.67% | 1.07%  | 0.67%  | 0.47%            | 1.93%  | 2.79% | 2.27%  | 1.91%  | 3.68% | 2.97% |
| <i>Lactobacillus salivarius</i> | 1.8                                    | 0.34%            | 0.70%              | 0.98%  | 0.83%  | 1.59%  | 1.36% | 0.57%  | 0.36%  | 2.00%            | 2.49%  | 2.13% | 1.55%  | 4.01%  | 3.07% |       |

|        |                                          |       |       |       |       |       |       |       |        |       |       |        |       |       |       |       |
|--------|------------------------------------------|-------|-------|-------|-------|-------|-------|-------|--------|-------|-------|--------|-------|-------|-------|-------|
|        | <i>Lactobacillus reuteri</i>             | 2.3   | 0.22% | 0.82% | 0.86% | 0.89% | 1.44% | 1.27% | 0.82%  | 0.44% | 1.95% | 2.82%  | 2.10% | 1.92% | 3.93% | 6.68% |
|        | <i>Clostridium perfringens</i>           | 3.3   | 0.68% | 0.70% | 0.89% | 0.99% | 0.99% | 0.75% | 1.26%  | 0.49% | 0.66% | 0.93%  | 1.28% | 2.08% | 1.33% | 7.17% |
|        | <i>Bacillus megaterium</i>               | 5.1   | 0.24% | 0.49% | 0.63% | 0.81% | 1.05% | 1.11% | 1.40%  | 0.43% | 0.65% | 1.16%  | 0.77% | 2.35% | 1.07% | 4.20% |
|        | <i>Psychrobacter cryohalolentis</i>      | 3.1   | 0.84% | 0.77% | 0.86% | 0.96% | 1.04% | 0.73% | 0.46%  | 1.02% | 1.06% | 1.09%  | 1.20% | 1.62% | 1.16% | 1.23% |
|        | <i>Arthrobacter arilaitensis</i>         | 3.9   | 0.48% | 0.96% | 0.80% | 0.80% | 1.19% | 0.88% | 0.53%  | 0.64% | 1.15% | 1.27%  | 1.13% | 1.01% | 1.29% | 1.08% |
|        | <i>Ramlibacter tataouinensis</i>         | 4.1   | 1.23% | 1.10% | 0.64% | 0.85% | 0.41% | 0.62% | 0.78%  | 1.02% | 0.79% | 0.52%  | 0.64% | 0.52% | 0.52% | 0.30% |
|        | <i>Nakamurella multipartita</i>          | 6.1   | 1.17% | 0.85% | 0.60% | 0.71% | 0.77% | 0.49% | 0.90%  | 1.04% | 0.94% | 0.42%  | 0.53% | 0.45% | 0.35% | 0.34% |
|        | <i>Streptococcus infantarius</i>         | 2.0   | 0.44% | 0.83% | 0.59% | 0.67% | 0.93% | 1.14% | 0.50%  | 0.43% | 0.87% | 1.25%  | 1.13% | 1.05% | 1.43% | 2.59% |
|        | <i>Stenotrophomonas maltophilia</i>      | 4.9   | 0.52% | 0.61% | 2.00% | 0.47% | 0.36% | 0.42% | 0.59%  | 0.36% | 0.62% | 0.98%  | 0.70% | 0.44% | 0.43% | 0.32% |
|        | <i>Arthrobacter chlorophenolicus</i>     | 4.4   | 0.87% | 0.87% | 0.65% | 0.76% | 0.49% | 0.52% | 0.64%  | 1.33% | 1.29% | 0.86%  | 0.84% | 0.78% | 0.71% | 0.48% |
|        | <i>Mycobacterium gilvum</i>              | 5.6   | 0.71% | 0.75% | 0.60% | 0.61% | 0.66% | 0.88% | 0.51%  | 0.79% | 0.75% | 0.50%  | 1.01% | 0.70% | 0.68% | 0.77% |
|        | <i>Methylobacterium extorquens</i>       | 6.0   | 0.67% | 0.62% | 0.54% | 0.77% | 0.43% | 0.53% | 0.87%  | 0.45% | 0.44% | 0.59%  | 0.52% | 0.52% | 0.44% | 0.38% |
|        | <i>Methylobacterium chloromethanicum</i> | 5.8   | 0.64% | 0.61% | 0.57% | 0.76% | 0.39% | 0.51% | 0.80%  | 0.45% | 0.44% | 0.60%  | 0.51% | 0.52% | 0.42% | 0.34% |
|        | <i>Corynebacterium efficiens</i>         | 3.1   | 0.49% | 0.74% | 0.79% | 0.76% | 0.57% | 0.56% | 0.35%  | 0.89% | 0.97% | 0.96%  | 0.85% | 0.77% | 0.90% | 0.88% |
|        | <i>Saccharomonospora viridis</i>         | 4.3   | 0.19% | 0.40% | 0.90% | 0.41% | 0.62% | 0.80% | 0.42%  | 0.53% | 0.92% | 0.97%  | 0.62% | 2.06% | 0.68% | 2.33% |
|        | <i>Nocardiopsis alba</i>                 | 5.8   | 0.19% | 0.49% | 0.77% | 0.66% | 0.36% | 0.54% | 0.31%  | 0.37% | 0.77% | 0.97%  | 0.83% | 0.76% | 0.85% | 0.44% |
|        | <i>Psychrobacter arcticus</i>            | 2.7   | 0.43% | 0.36% | 0.43% | 0.54% | 0.50% | 0.35% | 0.21%  | 0.53% | 0.48% | 0.54%  | 0.55% | 0.72% | 0.56% | 0.61% |
|        | <i>Leuconostoc mesenteroides</i>         | 2.0   | 0.37% | 0.27% | 0.34% | 0.34% | 0.76% | 0.29% | 0.30%  | 0.39% | 0.39% | 0.34%  | 0.42% | 0.54% | 0.34% | 0.82% |
|        | <i>Streptomyces coelicolor</i>           | 8.7   | 0.23% | 0.38% | 0.49% | 0.34% | 0.35% | 0.47% | 0.29%  | 0.38% | 0.49% | 0.42%  | 0.40% | 0.63% | 0.45% | 0.48% |
| Fungus | <i>Aspergillus fumigatus</i> Af293       | 29.4  | 0.07% | 0.11% | 0.70% | 0.41% | 0.94% | 0.71% | 0.66%  | 0.29% | 0.64% | 1.91%  | 2.18% | 2.58% | 1.25% | 3.04% |
|        | <i>Saccharomyces cerevisiae</i> S288c    | 12.1  | 0.02% | 0.04% | 0.10% | 0.07% | 0.37% | 0.07% | 0.05%  | 0.06% | 0.09% | 0.12%  | 0.12% | 0.28% | 0.17% | 0.47% |
| Virus  | Human adenovirus C                       | 0.036 | 0.25% | 0.36% | 0.46% | 1.52% | 5.33% | 4.63% | 17.55% | 0.16% | 0.36% | 13.03% | 0.56% | 0.39% | 4.97% | 1.75% |
|        | <i>Pseudomonas</i> phage F116            | 0.065 | 0.37% | 0.62% | 1.96% | 2.42% | 5.78% | 5.43% | 3.87%  | 0.03% | 0.39% | 0.26%  | 0.98% | 0.59% | 1.31% | 1.38% |
|        | Enterobacteria phage P1                  | 0.095 | 0.09% | 0.16% | 0.14% | 0.22% | 0.22% | 0.21% | 0.18%  | 0.09% | 0.29% | 0.22%  | 0.18% | 0.29% | 0.36% | 0.29% |

**Table S4.** Summary of PM and meteorological data. The daily temperature, relative humidity, atmospheric pressure, and wind velocity data were 23-hour averages.

| Sampling date | Cut-point diameter ( $\mu\text{m}$ ) | Weather  | Temperature ( $^{\circ}\text{C}$ ) | Relative humidity (%) | Atmospheric pressure (Hpa) | Wind velocity (m/s) | Net weight of filters (g) | PM concentration of Tsinghua District ( $\mu\text{g}/\text{m}^3$ ) | PM concentration of Haidian monitoring site ( $\mu\text{g}/\text{m}^3$ ) | AQI of Haidian District |       |     |
|---------------|--------------------------------------|----------|------------------------------------|-----------------------|----------------------------|---------------------|---------------------------|--------------------------------------------------------------------|--------------------------------------------------------------------------|-------------------------|-------|-----|
|               |                                      |          |                                    |                       |                            |                     |                           |                                                                    |                                                                          | BJZWY*                  | BBXQ* | WL* |
| 01/08         | 2.5                                  | Clear    | -5.03                              | 29.46                 | 1026.36                    | 3.02                | 0.071                     | 45.21                                                              | 9.67                                                                     | 83                      | 113   | 109 |
|               | 10                                   |          |                                    |                       |                            |                     | 0.117                     | 75.03                                                              | 22.00                                                                    |                         |       |     |
| 01/09         | 2.5                                  | Clear    | -5.18                              | 44.96                 | 1023.11                    | 1.55                | 0.163                     | 104.53                                                             | 80.00                                                                    | 58                      | NA    | 77  |
|               | 10                                   |          |                                    |                       |                            |                     | 0.235                     | 150.70                                                             | 98.33                                                                    |                         |       |     |
| 01/10         | 2.5                                  | Overcast | -4.48                              | 66.54                 | 1020.21                    | 1.60                | 0.411                     | 263.56                                                             | 288.67                                                                   | 241                     | 242   | 258 |
|               | 10                                   |          |                                    |                       |                            |                     | 0.543                     | 348.21                                                             | 321.00                                                                   |                         |       |     |
| 01/11         | 2.5                                  | Clear    | -5.71                              | 74.88                 | 1018.14                    | 1.06                | 0.368                     | 235.67                                                             | 226.67                                                                   | 304                     | 264   | 413 |
|               | 10                                   |          |                                    |                       |                            |                     | 0.528                     | 338.59                                                             | 242.67                                                                   |                         |       |     |
| 01/12         | 2.5                                  | Misty    | -2.75                              | 73.08                 | 1017.49                    | 1.35                | 0.519                     | 332.82                                                             | 444.67                                                                   | 360                     | 291   | 498 |
|               | 10                                   |          |                                    |                       |                            |                     | 0.741                     | 475.18                                                             | 498.33                                                                   |                         |       |     |
| 01/13         | 2.5                                  | Overcast | -4.80                              | 80.75                 | 1018.82                    | 1.20                | 0.409                     | 261.96                                                             | 310.33                                                                   | 391                     | 457   | 401 |
|               | 10                                   |          |                                    |                       |                            |                     | 0.561                     | 359.75                                                             | 327.67                                                                   |                         |       |     |
| 01/14         | 2.5                                  | Clear    | -2.38                              | 72.96                 | 1022.15                    | 2.13                | 0.274                     | 175.39                                                             | 162.33                                                                   | 280                     | 328   | 337 |
|               | 10                                   |          |                                    |                       |                            |                     | 0.380                     | 243.68                                                             | 152.67                                                                   |                         |       |     |

“NA” indicates no available data from the official website of Beijing Municipality Environmental Monitoring Center.

\*“BJZWY”, “BBXQ”, “WL” are the abbreviated names of the three monitoring sites in Haidian District.

**Table S5. Airborne bacteria and archaea identified at the genus level from Tsinghua PM study and three previous studies combined<sup>5-7</sup>.**

| Tsinghua PM study                                                                                                                                                                                                                                                                                                                                                                                                                                                                                                                                                                                                                                                                                                                                                                                                                                                                                                                                                                                                                                                                                                                                                                                                                                                                                                                                                                                                                                                                                                                                                                                                                                                                                                                                                                                                                                                                                                                                                                                                                                                                                                                                                                                                                                                                                                                                                                                                                                                                                                                                                                                                                                                                                                                                                                                                                    | GRIP, Milan, and New York studies                                                                                                                                                                                                                                                                                                                                                                                                                                                                                                                                                                                                                                                                                                                                                                                                                                                                                                                                                                                                                                                                                                                                                                                                                                                                                                                                                                                                                                                                                                                                                                                                                                                                                                                                                                                                                                                                                                                                                                                                                                                                                                                                                                                                                                                                                                                                                                                                                                                                                                                                                                                                                                                                                                                                                                                                                                                                      | Overlap                                                                                                                                                                                                                                                                                                                                                                                                                                                                                                                                                                                                                                                                                                                                                                                                                                                                                                                                                                                                                                                                                                                                                                                                                                                                                                                                                                                                                                                                                                                                                                                                                                                                                                                                                                                                                                                                                                                                                                                                                                                                                                                                                                                                                                                                                                                                                                                                                                                                                                                                                                                                                                                                                                                                                                                                                                                                                                                                                    |
|--------------------------------------------------------------------------------------------------------------------------------------------------------------------------------------------------------------------------------------------------------------------------------------------------------------------------------------------------------------------------------------------------------------------------------------------------------------------------------------------------------------------------------------------------------------------------------------------------------------------------------------------------------------------------------------------------------------------------------------------------------------------------------------------------------------------------------------------------------------------------------------------------------------------------------------------------------------------------------------------------------------------------------------------------------------------------------------------------------------------------------------------------------------------------------------------------------------------------------------------------------------------------------------------------------------------------------------------------------------------------------------------------------------------------------------------------------------------------------------------------------------------------------------------------------------------------------------------------------------------------------------------------------------------------------------------------------------------------------------------------------------------------------------------------------------------------------------------------------------------------------------------------------------------------------------------------------------------------------------------------------------------------------------------------------------------------------------------------------------------------------------------------------------------------------------------------------------------------------------------------------------------------------------------------------------------------------------------------------------------------------------------------------------------------------------------------------------------------------------------------------------------------------------------------------------------------------------------------------------------------------------------------------------------------------------------------------------------------------------------------------------------------------------------------------------------------------------|--------------------------------------------------------------------------------------------------------------------------------------------------------------------------------------------------------------------------------------------------------------------------------------------------------------------------------------------------------------------------------------------------------------------------------------------------------------------------------------------------------------------------------------------------------------------------------------------------------------------------------------------------------------------------------------------------------------------------------------------------------------------------------------------------------------------------------------------------------------------------------------------------------------------------------------------------------------------------------------------------------------------------------------------------------------------------------------------------------------------------------------------------------------------------------------------------------------------------------------------------------------------------------------------------------------------------------------------------------------------------------------------------------------------------------------------------------------------------------------------------------------------------------------------------------------------------------------------------------------------------------------------------------------------------------------------------------------------------------------------------------------------------------------------------------------------------------------------------------------------------------------------------------------------------------------------------------------------------------------------------------------------------------------------------------------------------------------------------------------------------------------------------------------------------------------------------------------------------------------------------------------------------------------------------------------------------------------------------------------------------------------------------------------------------------------------------------------------------------------------------------------------------------------------------------------------------------------------------------------------------------------------------------------------------------------------------------------------------------------------------------------------------------------------------------------------------------------------------------------------------------------------------------|------------------------------------------------------------------------------------------------------------------------------------------------------------------------------------------------------------------------------------------------------------------------------------------------------------------------------------------------------------------------------------------------------------------------------------------------------------------------------------------------------------------------------------------------------------------------------------------------------------------------------------------------------------------------------------------------------------------------------------------------------------------------------------------------------------------------------------------------------------------------------------------------------------------------------------------------------------------------------------------------------------------------------------------------------------------------------------------------------------------------------------------------------------------------------------------------------------------------------------------------------------------------------------------------------------------------------------------------------------------------------------------------------------------------------------------------------------------------------------------------------------------------------------------------------------------------------------------------------------------------------------------------------------------------------------------------------------------------------------------------------------------------------------------------------------------------------------------------------------------------------------------------------------------------------------------------------------------------------------------------------------------------------------------------------------------------------------------------------------------------------------------------------------------------------------------------------------------------------------------------------------------------------------------------------------------------------------------------------------------------------------------------------------------------------------------------------------------------------------------------------------------------------------------------------------------------------------------------------------------------------------------------------------------------------------------------------------------------------------------------------------------------------------------------------------------------------------------------------------------------------------------------------------------------------------------------------------|
| Roseomonas, Chroococcidiopsis, Geodermatophilus, Serinicoccus, Porphyromonas, Streptomyces, Skermanella, Phormidium, Rubellimicrobium, Saccharopolyspora, Friedmanniella, Paracoccus, Alicyclobacillus, Propionicimonas, Aestuariimicrobium, Marmoricola, Deinococcus, Thermoactinomyces, Blastococcus, Nocardioidea, Flavisolibacter, Microlunatus, Kaistobacter, Micromonospora, Cellvibrio, Modestobacter, Paenibacillus, Mesorhizobium, Luteococcus, Archangium, Kocuria, Rhodoplanes, Massilia, Candidatus Microthrix, Actinotalea, UA01, Bacteroides, Pontibacter, Sporosarcina, Arthrobacter, Candidatus Nitrososphaera, Pseudonocardia, Propionibacterium, Planomicrobium, Hymenobacter, Iamia, Gillisia, Arsenicoccus, Tessaracoccus, Sphingomonas, Actinomadura, Bacillus, Rathayibacter, Adhaeribacter, Alkanindiges, Prevotella, Azospirillum, Plesiocystis, Chondromyces, Novosphingobium, Devosia, Mycobacterium, Fusobacterium, Carnobacterium, Actinomycetospira, Turcibacter, Phycococcus, Amaricoccus, Laceyella, Corynebacterium, Planctomyces, Nitrosomonas, Brevundimonas, Psychrobacter, Thiocloava, Myroides, Actinoplanes, Janibacter, Brevibacterium, Alistipes, Clostridium, Desulfovibrio, Epulopiscium, Methylothera, Nannocystis, Herbaspirillum, Azohydromonas, Leptolyngbya, LE30, Cytophaga, Algoriphagus, Oxalobacter, Aeromicrobium, Euzebia, Planococcus, Lysobacter, Methylobacterium, Coprococcus, Anabaena, Myxococcus, Calothrix, Salinicoccus, Ruminococcus, Agrococcus, Promicromonospora, Segetibacter, Lentibacillus, Georgenia, Ramlibacter, Rhodoferrax, Knoellia, Patulibacter, Arcobacter, Allobaculum, Rubrobacter, Treponema, Planifilum, Bifidobacterium, Fibrobacter, Prauserella, Leucobacter, Actinomyces, Microbacterium, Couchioplanes, Flavobacterium, Staphylococcus, Thermobifida, Paludibacter, Bulleidia, Brachyobacterium, Candidatus Solibacter, Jeotgaliococcus, Amycolatopsis, Actinoalloteichus, Methanobrevibacter, Brevibacillus, Hahella, Pedobacter, Nitrososphaera, Virgibacillus, Oerskovia, Gemmata, Oscillatoria, Lactobacillus, Micrococcus, Wautersiella, Microcoleus, Leptospira, Methylobium, Sejongia, Oceanobacillus, Exiguobacterium, Chthoniobacter, Marinilactibacillus, Yaniella, Dietzia, Luteolibacter, Rhodococcus, Asticcacaulis, Megamonas, Dyadobacter, Aerococcus, Rothia, Williamsia, Spirosoma, Enterobacter, Kineococcus, Moraxella, Balneimonas, Weissella, Alkalibacterium, J2-29, Pantoea, Cellulomonas, Caldilinea, Phenylobacterium, Adlercreutzia, Akkermansia, Dehalobacterium, Sphingobium, Parabacteroides, Okibacterium, Pseudomonas, Methylophilus, Shinella, Phascolarctobacterium, Trichococcus, Curtobacterium, Thermomonas, Candidatus Entotheonella, Gemmatimonas, Veillonella, Halomonas, Virgisporangium, Haliangium, | Clostridium, Alkalibacterium, Nocardioidea, Azohydromonas, Georgenia, Ureibacillus, Diaphorobacter, Staphylococcus, Propionibacterium, Ralstonia, Microbacterium, Saccharopolyspora, Rhodococcus, Salinicoccus, Pimelobacter, Stenotrophomonas, Coprococcus, Sphingomonas, Streptococcus, Corynebacterium, Acinetobacter, Pseudomonas, Flavobacterium, Pedobacter, Streptomyces, Mycobacterium, Pantoea, Dyadobacter, Orthomyxococcus, Dietzia, Psychrobacter, Prevotella, Jeotgaliococcus, Acidovorax, Modestobacter, Aquabacterium, Kaistobacter, Friedmanniella, Lactobacillus, Rubellimicrobium, Roseateles, Janthinobacterium, Roseomonas, Deinococcus, Salmonella, Methylobium, Cellulomonas, Aerococcus, Alkanindiges, Bacteroides, Hymenobacter, Geodermatophilus, Bdellovibrio, Curvibacter, Nesterenkonia, Blastococcus, Pontibacter, Kocuria, Planococcus, Aeromonas, Bosea, Massilia, Spirosoma, Fusobacterium, Pseudonocardia, Faecalibacterium, Ruminococcus, Propionicimonas, Chryseobacterium, Bacillus, Lactococcus, Novosphingobium, Microcystis, HTCC2207, Microcoleus, Iamia, Pandoraea, Rhodoferrax, Anaerococcus, Aurantimonas, Skermanella, Rothia, Catenibacterium, Frankia, Treponema, Paracoccus, Salegentibacter, Janibacter, Terracoccus, Agrococcus, Prauserella, Escherichia, Planomicrobium, Dermacoccus, Saccharomonospora, Chroococcidiopsis, Marmoricola, Gordonia, Blautia, Flavisolibacter, Olivibacter, Sphingobacterium, Methylobacterium, Gemella, Amaricoccus, Enterococcus, Chthoniobacter, Paenibacillus, Brevibacterium, Wautersiella, Parabacteroides, Eubacterium, Actinomycetospira, Afipia, Hydrogenophilus, Brachyobacterium, Enhydrobacter, Sphingobium, Cenarchaeum, Burkholderia, Dialister, Micrococcus, Brevundimonas, Bifidobacterium, Roseburia, Oxalobacter, Sejongia, Arthrobacter, Phenylobacterium, Desulfovibrio, Rhizobium, Phormidium, Dokdonella, Alcaligenes, Devosia, Carnobacterium, Glycomyces, Candidatus Xiphinematobacter, Ramlibacter, Cellvibrio, Segetibacter, Pigmentiphaga, Spiroplasma, Micromonospora, Cystobacter, Luteibacter, Marinobacter, Ignatzschineria, Neisseria, Thermobispora, Nocardia, Actinotalea, Halobacterium, Citricoccus, Salinimicrobium, Limnobacter, Alcanivorax, Arsenicoccus, Rubrobacter, Porphyrobacter, Aestuariimicrobium, Mycoplasma, Knoellia, Variovorax, Arcobacter, Tessaracoccus, Helicobacter, Porphyromonas, Yonghaparkia, Peptostreptococcus, Selenomonas, Shinella, Leuconostoc, Gillisia, Finegoldia, Actinomyces, Lamproedia, Paucibacter, Sodalisa, Adhaeribacter, Halomonas, Erythrobacter, Novispirillum, Erwinia, Polaromonas, Lysobacter, PSB-M-3, Nocardioidea, Mesorhizobium, Candidatus Phytoblastia, Planctomyces, Candidatus Rhabdochlamydia, Rhodopirellula, MC18, Candidatus Endobugula, Algoriphagus, Tatlockia, Achromobacter, Balneimonas, Planifilum, Syntrophus, | Roseomonas, Chroococcidiopsis, Geodermatophilus, Serinicoccus, Porphyromonas, Streptomyces, Skermanella, Phormidium, Rubellimicrobium, Saccharopolyspora, Friedmanniella, Paracoccus, Alicyclobacillus, Propionicimonas, Aestuariimicrobium, Marmoricola, Deinococcus, Thermoactinomyces, Blastococcus, Nocardioidea, Flavisolibacter, Microlunatus, Kaistobacter, Micromonospora, Cellvibrio, Modestobacter, Paenibacillus, Mesorhizobium, Luteococcus, Archangium, Kocuria, Rhodoplanes, Massilia, Actinotalea, Bacteroides, Pontibacter, Sporosarcina, Arthrobacter, Candidatus Nitrososphaera, Pseudonocardia, Propionibacterium, Planomicrobium, Hymenobacter, Iamia, Gillisia, Arsenicoccus, Tessaracoccus, Sphingomonas, Actinomadura, Bacillus, Rathayibacter, Adhaeribacter, Alkanindiges, Prevotella, Novosphingobium, Devosia, Mycobacterium, Fusobacterium, Carnobacterium, Actinomycetospira, Turcibacter, Amaricoccus, Corynebacterium, Planctomyces, Nitrosomonas, Brevundimonas, Psychrobacter, Thiocloava, Myroides, Actinoplanes, Janibacter, Brevibacterium, Alistipes, Clostridium, Desulfovibrio, Epulopiscium, Methylothera, Azohydromonas, Leptolyngbya, LE30, Cytophaga, Algoriphagus, Oxalobacter, Algoriphagus, Oxalobacter, Aeromicrobium, Euzebia, Planococcus, Lysobacter, Methylobacterium, Coprococcus, Agrococcus, Myxococcus, Calothrix, Salinicoccus, Ruminococcus, Agrococcus, Promicromonospora, Segetibacter, Lentibacillus, Georgenia, Ramlibacter, Rhodoferrax, Knoellia, Patulibacter, Arcobacter, Allobaculum, Rubrobacter, Treponema, Planifilum, Bifidobacterium, Fibrobacter, Prauserella, Leucobacter, Actinomyces, Microbacterium, Flavobacterium, Staphylococcus, Paludibacter, Bulleidia, Brachyobacterium, Candidatus Solibacter, Jeotgaliococcus, Amycolatopsis, Actinoalloteichus, Methanobrevibacter, Brevibacillus, Pedobacter, Gemmata, Lactobacillus, Micrococcus, Wautersiella, Microcoleus, Methylobium, Sejongia, Oceanobacillus, Exiguobacterium, Chthoniobacter, Marinilactibacillus, Yaniella, Dietzia, Luteolibacter, Rhodococcus, Rhodococcus, Asticcacaulis, Megamonas, Dyadobacter, Aerococcus, Gemmata, Lactobacillus, Micrococcus, Wautersiella, Microcoleus, Kineococcus, Moraxella, Balneimonas, Weissella, Alkalibacterium, J2-29, Pantoea, Cellulomonas, Caldilinea, Phenylobacterium, Adlercreutzia, Akkermansia, Dehalobacterium, Sphingobium, Parabacteroides, Pseudomonas, Shinella, Trichococcus, Curtobacterium, Thermomonas, Candidatus Entotheonella, Gemmatimonas, Veillonella, Halomonas, Haliangium, Glycomyces, Salinimicrobium, Nostoc, Aurantimonas, Rhizobium, Sphingobacterium, Pirellula, Sutterella, Ammoniphilus, Dechloromonas, Eubacterium, Frigoribacterium, Blautia, Terracoccus, Thermobispora, Dokdonella, Aquabacterium, Acinetobacter, Streptacidiphilus, Scytonema, Faecalibacterium, Solirubrobacter, Sharpea, Dermacoccus, Nocardioidea, Caulobacter, |

Glycomyces, Salinimicrobium, Nostoc, Aurantimonas, Rhizobium, Sphingobacterium, Pirellula, Sutterella, Ammoniphilus, Dechloromonas, Aeropyrum, Eubacterium, Frigoribacterium, Blautia, Lentzea, Terracoccus, Thermobispora, Dokdonella, Aquabacterium, Jiangella, Acinetobacter, Streptacidiphilus, Gloeobacter, Dermatophilus, Scytonema, Faecalibacterium, Solirubrobacter, Sharpea, Dermacoccus, Shimazuella, Nocardiosis, Caulobacter, Abiotrophia, Mechercharimyces, Actinopolymorpha, Sorangium, Legionella, Caloramator, Roseburia, p-75-a5, Hydrocarboniphaga, Chryseobacterium, Parachlamydia, Rhodocyclus, Pseudoxanthomonas, Simidia, Pimelobacter, Tissierella, Agromyces, Kouleothrix, Waddlia, Thermaerobacter, Cohnella, Candidatus Cloacamonas, Stenotrophomonas, Azonexus, Methanofollis, Methylocaldum, Helcococcus, Frankia, Cellulosimicrobium, Desulfotobacter, ZD0117, Sodalis, Paenisporosarcina, Isoptericola, Shewanella, Hyphomicrobium, Plantibacter, Ectothiorhodospira, Polaromonas, Comamonas, Marinobacter, Achromobacter, Geobacillus, Tsukamurella, Candidatus Rhabdochlamydia, Rhodopirellula, Planktothricoides, Simplicispira, Oceanospirillum, Nocardia, Methylomonas, Clavibacter, Cryobacterium, Marinibacillus, Candidatus Azobacteroides, Jonesia, Azospira, Aquicella, Streptococcus, Bdellovibrio, Saccharomonospora, Acidovorax, Paucibacter, Janthinobacterium, Spirulina, Chloroflexus, Rarobacter, Nitrospira, Lachnospira, Pseudobutyrvibrio, Trablusiella, Arthrobacter, Desulfosporosinus, Capnocytophaga, Oribacterium, Xanthobacter, Thauera, Anaerolinea, Natronorubrum, Hylemonella, Candidatus Odysella, Kaistia, Methylosinus, Solibacillus, Crossiella, Erythromicrobium, Anaeromyxobacter, Rhodopseudomonas, Delftia, Macrococcus, Loktanella, Anaerobiospirillum, Alkaliphilus, Microcella, Pigmentiphaga, MC18, Enterococcus, Oleibacter, Anoxybacillus, u114, Vagococcus, Lactococcus, Candidatus Xiphinematobacter, Lutibacterium, Candidatus Protochlamydia, Chitinophaga, Rubrivivax, Salegentibacter, Methanosarcina, Erythrobacter, Rhodobacter, Acidisoma, Desulfotobacterium, Z4MB24, Aquamonas, Geobacter, Anaerobacillus, Xenococcus, Rheinheimera, Lysinibacillus, Nitrospira, Microbulbifer, Steroidobacter, Niabella, Acetobacter, Gordonia, Edaphobacter, LCP-6, Oscillospira, Verrucomicrobium, Opatutus, Zymomonas, Sporanobacter, Pelotomaculum, Facklamia, Sanguibacter, Planktothrix, WCHB1-05, Bosea, Aeromonas, Erwinia, Kribbella, Bradyrhizobium, Methanospaerula, Thiobacillus, Cryocolla, Methyloversatilis, SHD-231, Roseococcus, Rummelibacillus, Pseudoruegeria, Aminiphilus, Ureibacillus, Thermobacillus, Cryptosporangium, Raoultella, Bartonella, Parapedobacter, Oscillochloris, Desulfobulbus, Inquilinus, Campylobacter, Variovorax, Desulfosporomusa, Labrys, Salinibacterium, Serratia, Luteimonas, Candidatus Koribacter, Mycoplasma, Spiroplasma, Actinokineospora,

Rhodoplanes, Hydrocoleum, Solirubrobacter, Megasphaera, Chloroflexus, Nitrosococcus, Acetobacterium, Oribacterium, Nitrosomonas, Microtetrastora, Fructobacillus, Geobacillus, Cytophaga, Blastochloris, Kineococcus, Desulfosporosinus, Sphingopyxis, Photobacterium, Colwellia, Agrobacterium, Sutterella, Vogesella, LE30, Rubrivivax, Ensifer, SGUS388, Chitinophaga, Proteus, Myroides, Pseudanabaena, Candidatus Solibacter, Demequina, Gemmata, Rhodobacter, Parachlamydia, Isoptericola, Alishewanella, Hyphomicrobium, Butyrvibrio, Rhodocyclus, Rickettsiella, Zymomonas, Fluviicola, Vibrio, Alistipes, Candidatus Liberibacter, Dechloromonas, Thalassobacillus, Candidatus Entotheonella, Methyloversatilis, Aquamonas, Thermomonas, Bulleidia, Sanguibacter, A17, Pseudobutyrvibrio, Agromyces, Methanolinea, Thiobacillus, Williamsia, Thioclava, Cronobacter, SJA-88, Candidatus Odysella, Halobacillus, Shewanella, Parapedobacter, Candidatus Protochlamydia, Caulobacter, Aneurinibacillus, Ideonella, Paludibacter, 4-29, Erythromicrobium, Candidatus Portiera, Exiguobacterium, BHB21, Roseococcus, Methanobrevibacter, Desulfurispirillum, Euzebia, Amycolatopsis, Parvibaculum, Helcococcus, Actinoalloteichus, Pedomicrobium, Singulisphaera, Aeromicrobium, Steroidobacter, Kribbella, Yaniella, Tissierella, A55\_D21, Aquicella, Anaeroplasmata, Succinivibrio, RFN20, Facklamia, Azotobacter, Aromatoleum, Cupriavidus, Peptoniphilus, Desemzia, Procabacter, Thermoanaerobacter, Brucella, Luteococcus, Veillonella, Opatutus, Campylobacter, Asticcacaulis, Megamonas, Trichococcus, Candidatus Glomeribacter, Klebsiella, Sharpea, Bradyrhizobium, Luteolibacter, Caldilinea, Runella, Rheinheimera, Lachnobacterium, Zoogloea, Simonsiella, Abiotrophia, Renibacterium, Scytonema, Granulicatella, Leclercia, Mechercharimyces, Xanthomonas, Nitratireductor, Actinopolymorpha, Haemophilus, Hydrogenophaga, Turicibacter, Methylophilus, Weissella, Thauera, Coprobacillus, Collinsella, Slackia, Peptococcus, Eggerthella, Gallionella, Thermoactinomyces, Pseudoclavibacter, Buchnera, Elizabethkingia, Sphaerochaeta, Thiomonas, Leptolyngbya, Alicyclobacillus, Methylothera, Thalassospira, Candidatus Pelagibacter, Adlercreutzia, Epulopiscium, Mycoplasma, Delftia, Maribacter, Rhodobaca, Oceanobacillus, Cyclobacterium, Arenimonas, Pirellula, Oscillospira, Caloramator, Marinimicrobium, Thiothrix, BD2-13, Thermicanus, Legionella, Rhodocista, Hylemonella, Cetobacterium, Sarcina, Akkermansia, Solibacillus, L7A\_E11, Actinomadura, Desulfonatronovibrio, Comamonas, Magnetospirillum, Methanocorpusculum, Shigella, Aquiflexum, Simplicispira, Actinokineospora, Limnhabitans, WCHB1-05, Yersinia, Bartonella, Salinibacter, Allobaculum, Verrucomicrobium, Candidatus Koribacter, p-75-a5, Cohnella, Leptotrichia, J2-29, Mucispirillum, Prosthecobacter, Bordetella, Fusibacter, Bacteriovorax, Curtobacterium, Nitrospira, Archangium,

Abiotrophia, Mechercharimyces, Actinopolymorpha, Legionella, Caloramator, Roseburia, p-75-a5, Hydrocarboniphaga, Chryseobacterium, Parachlamydia, Rhodocyclus, Pimelobacter, Tissierella, Agromyces, Kouleothrix, Waddlia, Cohnella, Stenotrophomonas, Helcococcus, Frankia, Cellulosimicrobium, Sodalis, Paenisporosarcina, Isoptericola, Shewanella, Hyphomicrobium, Polaromonas, Comamonas, Marinobacter, Achromobacter, Geobacillus, Candidatus Rhabdochlamydia, Rhodopirellula, Simplicispira, Nocardia, Methylomonas, Marinibacillus, Aquicella, Streptococcus, Bdellovibrio, Saccharomonospora, Acidovorax, Paucibacter, Janthinobacterium, Chloroflexus, Lachnospira, Pseudobutyrvibrio, Desulfosporosinus, Capnocytophaga, Oribacterium, Thauera, Hylemonella, Candidatus Odysella, Solibacillus, Erythromicrobium, Rhodopseudomonas, Delftia, Macrococcus, Pigmentiphaga, MC18, Enterococcus, Lactococcus, Candidatus Xiphinematobacter, Lutibacterium, Candidatus Protochlamydia, Chitinophaga, Rubrivivax, Salegentibacter, Erythrobacter, Rhodobacter, Acidisoma, Aquamonas, Geobacter, Rheinheimera, Nitrospira, Steroidobacter, Acetobacter, Gordonia, Oscillospira, Verrucomicrobium, Opatutus, Zymomonas, Facklamia, Sanguibacter, WCHB1-05, Bosea, Aeromonas, Erwinia, Kribbella, Bradyrhizobium, Thiobacillus, Methyloversatilis, Roseococcus, Ureibacillus, Raoultella, Bartonella, Parapedobacter, Campylobacter, Variovorax, Serratia, Luteimonas, Candidatus Koribacter, Mycoplasma, Spiroplasma, Actinokineospora, Nitratireductor, Rhodobaca, Candidatus Amoebophilus, Catellatospora, Pseudoclavibacter, Burkholderia, Pedomicrobium, Mycoplasma, Anaeroplasmata, A55\_D21, Citricoccus, Anaerofustis, Succinivibrio, Aromatoleum, Salmonella, Frateuria, Butyrvibrio, A17, Zoogloea, Singulisphaera, Pseudaminobacter, Phyllobacterium, Diaphorobacter, Hydrocoleum, Blastochloris, Halobacillus, Granulicatella, Leuconostoc, Runella, Gemella, Agrobacterium, Haererehalobacter, Methylophilus, Anaerococcus, Saccharothrix, Afipia, Gallionella, Pseudidiomarina, Ideonella, RFN20, Neisseria, Ralstonia, SJA-88, Halobacterium, Xanthomonas, Coprobacillus, Azotobacter, Zhihengliuella, BD2-13, L7A\_E11, Kineospora, Arcanobacterium, Leptotrichia, Cyclobacterium, Peptococcus, Megasphaera, Demequina, Sphaerochaeta, Alcanivorax, Methanolinea, Aquiflexum, Dolichospermum, Arenimonas, Muricauda, Kushneria, Solimonas, Nesterenkonina, Mitsuoella, Curvibacter, Yonghaparkia, Citrobacter, Dysgonomonas, Ignatzschineria, Dyella, Ochrobactrum, Streptobacillus, Symbiobacterium, Actinoallomurus, Pseudanabaena, Meiothermus, Collinsella, Mucispirillum, Lachnobacterium, Prochlorococcus, Procabacter, Emticicia, Klebsiella, Pseudoalteromonas, Sphingopyxis, Conchiformibius, Syntrophomonas, Teredinibacter, Nitrosococcus, Cupriavidus, Olivibacter, Cystobacter, Alcaligenes, Tatlockia, Sarcina, Haloanella, Caedibacter, Desemzia, Peptoniphilus, Acholeplasma,

Candidatus Methanoregula, Synechococcus, Nitratireductor, Streptobacillus, Wolbachia, Symbiobacterium, Desulfonatronum, Aneurinibacillus, Acetivibrio, Pelomonas, Balneola, Luteibacter, Nonomuraea, Rhodobaca, Candidatus Amoebophilus, Actinoallomurus, Rhodopseudomonas, Pseudoalteromonas, Luedemannella, Desulfotomaculum, Xylanimicrobium, Catellatospora, Pseudoclavibacter, Burkholderia, Pilmelia, Meiothermus, Dehalobacterium, Alteromonas, Waddlia, Actinobaculum, Renibacterium, Marinimicrobium, Syntrophus, Pedomicrobium, Mycoplasma, Atopobium, Anaeroplasm, Nitrosopumilus, Congregibacter, Oceanithermus, Prochlorococcus, Gelidibacter, Vibrio, Ensifer, Thalassobacillus, Desulfobacterium, Myceligenerans, Salinisphaera, A55\_D21, Sedimentibacter, Pelagicoccus, Dysgonomonas, Actinoplanes, Phyllobacterium, Eggerthella, Phaeospirillum, Magnetospirillum, Fluviicola, Citricoccus, Anaerofustis, Succinivibrio, Aromatoleum, Crenothrix, Acidobacterium, Acidisoma, nsmpVI18, Lewinella, Candidatus Liberibacter, 4-29, SGUS388, Ornithinococcus, Salmonella, Frateuria, Butyrivibrio, Collimonas, A17, Conchiformibus, Dolichospermum, Saccharothrix, Fusibacter, Microcystis, Slackia, Thermicanus, Thiothrix, Sinorhizobium, Rhodanobacter, Averyella, Zoogloea, Sulcia, Teredinibacter, Cellulosimicrobium, Mitsuokella, Aquitalea, Spirochaeta, Verrucosipora, Selenomonas, Leclercia, Singulisphaera, Pseudaminobacter, Phyllobacterium, Lautropia, Serinicoccus, Polaribacter, Dyella, Pelomonas, Oleispira, Porphyrobacter, Cetobacterium, Congregibacter, Prosthecobacter, Diaphorobacter, Methylophaga, Hydrocoleum, Blastochloris, Plesiomonas, Lutibacterium, Emticicia, Spirochaeta, Acholeplasma, Pandoraea, Rickettsiella, Kurthia, Thiomonas, Flectobacillus, Schlegelella, Halobacillus, Granulicatella, Leuconostoc, Runella, Haloplanus, Caedibacter, Ammoniphilus, Anaerofustis, Candidatus Phytolasma, PSB-M-3, Desulfomicrobium, Candidatus Gemella, Agrobacterium, Haererehalobacter, Catonella, Verminephrobacter, Methylomonas, Brevibacillus, Catellatospora, Mannheimia, Alysia, Methylophaga, Xenophilus, Desulfobacca, Pseudidiomarina, Acetivibrio, Citrobacter, Luedemannella, Anaerococcus, Saccharothrix, Dorea, Methylobacillus, Caldicellulosiruptor, Desulfotomaculum, Dehalobacter, Sporocytophaga, Afipia, Gallionella, Rhodovibrio, HB2-32-21, Sporosarcina, Flectobacillus, Frigoribacterium, Kouleothrix, Pseudidiomarina, Ideonella, RFN20, Neisseria, Ralstonia, SJA-88, Actinobaculum, Arcanobacterium, Leucobacter, Streptacidiphilus, Nordella, Halobacterium, Halorubrum, Xanthomonas, Frateuria, Gemmatimonas, Acidimicrobium, Kineosporia, Syntrophomonas, Sphaerotilus, Serratia, Desulfobacterium, Sphaerospermopsis, Coprobacillus, Kibdelosporangium, Gelidibacter, Nostoc, Luteimonas, Candidatus Amoebophilus, Azotobacter, Zhihengliuella, BD2-13, L7A\_E11, Dethiobacter, Geobacter, Haliangium, Myxococcus, Desulfomicrobium, Kineosporia, Arcanobacterium, Candidatus Scalindua, Leptotrichia, Beijerinckia, Cardiobacterium, Fibrobacter, Blastomonas, Nevskia, Cyclobacterium, Belliella, Peptococcus, Megasphaera, Demequina, Methylocystis, Halostagnicola, Enterobacter, Cycloclasticus, Sphaerochaeta, Alcanivorax, Methanolinea, Aequorivita, Fulvivirga, Halococcus, Macrococcus, Phaeospirillum, Pseudaminobacter, Aquiflexum, Dolichospermum, Arenimonas, Muricauda, Solimonas, Salimicrobium, Marinococcus, Lachnospira, Streptomonospora, Kushneria, Solimonas, Methylococcus, Halalkalicoccus, Candidatus Nitrososphaera, Rathayibacter, Thermomonospora, Chelativorans, Olsenella, Nesterenkonia, Natronococcus, Blattabacterium, Idiomarina, Marinibacillus, Thermaetogonium, Mitsuokella, Thermus, Wolinella, Curvibacter, Tetrathiobacter, Marinilactibacillus, Balneola, Marivita, Yonghaparkia, Leucothrix, Citrobacter, Terribacillus, Zhihengliuella, Microlunatus, Azorhizobium, Haererehalobacter, Chthonomonas, Dysgonomonas, Ignatzschineria, Dyella, Verrucosipora, Moraxella, Acetobacter, Raoultella, Ochrobactrum, Halomiconema, Streptosporangium, Hydrocarboniphaga, Haloanella, Xylanimicrobium, Desulfocapsa, Streptobacillus, Symbiobacterium, Actinoallomurus, Muricauda, Ochrobactrum, Capnocytophaga, Paenisporosarcina, Pseudanabaena, Meiothermus, Collinsella, Tenacibaculum, Kurthia, Insolitispirillum, Kushneria, Patulibacter, Mucispirillum, Lachnobacterium, Polynucleobacter, Prochlorococcus, Procabacter, Emticicia, Acidiphilium, Marinomonas, Klebsiella, Erysipelothrix, Pseudoalteromonas, Ruegeria, Sphingopyxis, Conchiformibus, Actinocorallia, Syntrophomonas, Aminobacter, Teredinibacter, Sinomonas, Hydrogenobaculum, Nitrosococcus, Rivularia, Cupriavidus, Azomonas, Olivibacter, Ancylobacter, Sulfuricurvum, Methanosphaera, Cystobacter, Terriglobus, Azorhizophilus, Alcaligenes, Tatlockia, Sarcina, Haloanella, Caldimonas, Asteroleplasma, Caedibacter, Desemzia, Kitasatospora, Peptoniphilus, Acholeplasma, Heliorestis, Aneurinibacillus, Niastella, Acetivibrio, Pelomonas, Balneola, Luteibacter, Methanocella, Luedemannella, Oceanisphaera, Desulfotomaculum, Trichodesmium, Xylanimicrobium, Moorella, Skermania, Anaerofilum, Providencia, Dactylosporangium, Gardnerella, Catenulispora, Actinobaculum, Renibacterium, Gluconacetobacter, Candidatus Aquirestis, Sporichthya, Coriobacterium, Sulfurospirillum, Candidatus Contubernalis, Marinimicrobium,

---

Syntrophus, Gluconobacter, Gelidibacter, Thermosynechococcus, Vibrio, Stigmatella, Ensifer, Oceanimonas, Thalassobacillus, Martellella, Buttiauxella, Segniliparus, Methyloarcula, Aphanothece, Desulfobacterium, Eggerthella, Aphanizomenon, Phaeospirillum, Marinospirillum, Octadecabacter, Tropheryma, JG37-AG-70, Fischerella, Azoarcus, Sphaerisporangium, Magnetospirillum, Fluviicola, Candidatus Liberibacter, Chroococcus, Actinocatenispora, Mariprofundus, Avibacterium, 4-29, SGUS388, Candidatus Aquiluna, Candidatus Cardinium, Ornithinococcus, Rhodovulum, Fusibacter, Telmatospirillum, Microcystis, Slackia, Symploca, Thermicanus, Dermabacter, Thiothrix, Spirochaeta, Ferrimicrobium, Brachyspira, Salinispora, Acrocarpospora, Psychroserpens, Verrucosipora, Selenomonas, Leclercia, Leptospirillum, Thioalkalivibrio, Thermosinus, Porphyrobacter, Natronincola, Cetobacterium, Sneathia, Ignavibacterium, Coralloccoccus, T78, YNPFP6, Microbispora, Candidatus Tammella, Rhodothermus, Thiohalospira, Arthronema, Brachymonas, Congregibacter, Haloferula, Prostheco bacter, Rhodobium, Halochromatium, Prochloron, Jannaschia, Methanobacterium, Pandoraea, Saccharospirillum, Halanaerobium, Magnetococcus, Umboniibacter, Rickettsiella, Psychromonas, Kurthia, Dichelobacter, Tetrasphaera, Thiomonas, Thermodesulfobivibrio, Thermovenabulum, Thermincola, Flectobacillus, Actinosynnema, Actinopolyspora, Pediococcus, Phaeobacter, Gloeotheca, Candidatus Phytoplasma, PSB-M-3, Rickettsia, Pelobacter, Piscirickettsia, Desulfomicrobium, Candidatus Portiera

---

**Table S6.** Public data of metagenomic studies used in PCA analysis (relative abundance as the input variables).

| Habitat           | Project Name                                             | Project link                                                                                                          | Sample ID                                                                                                                |
|-------------------|----------------------------------------------------------|-----------------------------------------------------------------------------------------------------------------------|--------------------------------------------------------------------------------------------------------------------------|
| Bloom lake        | <a href="#">Freshwater Microcystis Bloom Metagenomes</a> | <a href="http://metagenomics.anl.gov/linkin.cgi?project=1207">http://metagenomics.anl.gov/linkin.cgi?project=1207</a> | 4467058.3, 4467059.3                                                                                                     |
| Agricultural soil | EarlhamMetagenomes2012                                   | <a href="http://metagenomics.anl.gov/linkin.cgi?project=2850">http://metagenomics.anl.gov/linkin.cgi?project=2850</a> | 4508937.3, 4508938.3,<br>4508939.3, 4508940.3,<br>4508941.3, 4508942.3                                                   |
| Open ocean        | <a href="#">Global Ocean Sampling Expedition</a>         | <a href="http://metagenomics.anl.gov/linkin.cgi?project=27">http://metagenomics.anl.gov/linkin.cgi?project=27</a>     | 4441126.3, 4441129.3,<br>4441139.4, 4441615.3,<br>4441576.3, 4441578.3,<br>4441592.3, 4441661.3,<br>4441588.3, 4441594.3 |
| Coastal ocean     | <a href="#">Global Ocean Sampling Expedition</a>         | <a href="http://metagenomics.anl.gov/linkin.cgi?project=27">http://metagenomics.anl.gov/linkin.cgi?project=27</a>     | 4441580.3, 4441583.3,<br>4441148.3, 4441613.3,<br>4441596.4, 4441601.3,<br>4441586.3, 4441660.3,<br>4441591.3, 4441605.3 |
| Anarobic sludges  | Beer-to-Caproate                                         | <a href="http://metagenomics.anl.gov/linkin.cgi?project=397">http://metagenomics.anl.gov/linkin.cgi?project=397</a>   | 4480719.3, 4480764.3,<br>4480776.3, 4480815.3,<br>4480859.3, 4480861.3,<br>4480863.3, 4480864.3,<br>4480865.3, 4480867.3 |



**Table S7.** Annotations of the 48 most common bacterial, 2 fungal, and 3 viral species.

| Organism | Species                                | Aerobic /anaerobic      | Descriptions                                                                                                                                                                                                                                                                 | References    |
|----------|----------------------------------------|-------------------------|------------------------------------------------------------------------------------------------------------------------------------------------------------------------------------------------------------------------------------------------------------------------------|---------------|
| Bacteria | <i>Geodermatophilus obscurus</i>       | aerobic                 | soil and rock varnish, lytic capability of yeast cell walls, UV-C resistance, strong production of extracellular functional amyloid and manganese oxidation                                                                                                                  | <sup>9</sup>  |
|          | <i>Modestobacter marinus</i>           | aerobic                 | predominant in the first two millimeters of calcarenite stone surfaces, access to various trace carbon sources, availability highly resistant to desiccation and to gamma- and high-energy UV radiations                                                                     | <sup>10</sup> |
|          | <i>Blastococcus saxosidens</i>         | aerobic                 | thriving in inhospitable and bleak biotopes as the interior of stones, thermophilic esterases, resistance to several metals higher than those of its phylogenetic relatives, low resistance to several oxidizing stresses                                                    | <sup>11</sup> |
|          | <i>Kocuria rhizophila</i>              | aerobic                 | halotolerant, tolerant to a wide variety of organic solvents, ability to grow rapidly and at high cell density, robust at various growth conditions                                                                                                                          | <sup>12</sup> |
|          | <i>Micrococcus luteus</i>              | aerobic                 | diverse chemotaxonomic features dormancy, able to concentrate heavy metals from low-grade ores, Fleming strain                                                                                                                                                               | <sup>13</sup> |
|          | <i>Candidatus Nitrospira defluvii</i>  | aerobic                 | uncultivated nitrite-oxidizing bacteria, resistance to ampicillin                                                                                                                                                                                                            | <sup>14</sup> |
|          | <i>Methylobacterium radiotolerans</i>  | aerobic                 | multilayered cell wall structure, facultative methylotroph, high resistance to gamma radiation                                                                                                                                                                               | <sup>15</sup> |
|          | <i>Thermobifida fusca</i>              | aerobic                 | moderately thermophilic, filamentous, a major degrader of plant cell walls in heated organic materials, spores can be allergenic, associated with farmers lung                                                                                                               | <sup>16</sup> |
|          | <i>Nocardioides</i> sp.                | aerobic                 | ability to metabolize unusual substrates, including butane, jet fuel, phenanthrene, p-nitrophenol, trinitrophenol, atrazine, ethene, and vinyl chloride                                                                                                                      | <sup>17</sup> |
|          | <i>Propionibacterium acnes</i>         | anaerobic               | a commensal organism on human skin, implicated in various infections including acne vulgaris, endocarditis, osteomyelitis, and prostate cancer; the only microorganism that has been isolated from sarcoid lesions by bacterial culture                                      | <sup>18</sup> |
|          | <i>Brachybacterium faecium</i>         | aerobic                 | capable of degrading uric acid and fermenting cellobiose, glucose, maltose, and man-nose, but not cellulose, chitin, or gelatin                                                                                                                                              | <sup>19</sup> |
|          | <i>Cellvibrio gilvus</i>               | aerobic                 | isolated from bovine feces, cellulolytic, disaccharide preference                                                                                                                                                                                                            | <sup>20</sup> |
|          | <i>Arthrobacter phenanthrenivorans</i> | aerobic                 | phenanthrene and anthracene as sole carbon sources, isolated from a creosote-contaminated site                                                                                                                                                                               | <sup>21</sup> |
|          | <i>Nocardiopsis dassonvillei</i>       | aerobic                 | isolated from a large variety of natural habitats such as soil and marine sediments, from different plant and animal materials as well as from human patients, participating actively in biopolymer degradation, associated with actinomycetoma, conjunctivitis, cholangitis | <sup>22</sup> |
|          | <i>Carnobacterium</i> sp.              | facultative             | ubiquitous lactic acid bacteria, tolerant to freezing/thawing and high pressure, able to grow at low temperatures                                                                                                                                                            | <sup>23</sup> |
|          | <i>Microbacterium testaceum</i>        | aerobic                 | endophytic within plant hosts, N-acylhomoserine lactone-degrading activity                                                                                                                                                                                                   | <sup>24</sup> |
|          | <i>Paracoccus denitrificans</i>        | facultative             | capable of thriving in soil, ability to single-handedly convert nitrate to dinitrogen via denitrification                                                                                                                                                                    | <sup>25</sup> |
|          | <i>Kytococcus sedentarius</i>          | aerobic                 | production of oligoketide antibiotics, opportunistic pathogen causing valve endocarditis, hemorrhagic pneumonia, and pitted keratolysis                                                                                                                                      | <sup>26</sup> |
|          | <i>Sanguibacter keddiei</i>            | facultatively anaerobic | blood isolate, short, irregular rods, mesophilic                                                                                                                                                                                                                             | <sup>27</sup> |
|          | <i>Kineococcus radiotolerans</i>       | aerobic                 | isolated from high-level radioactive waste, radiation and desiccation resistance                                                                                                                                                                                             | <sup>28</sup> |

|                                      |                         |                                                                                                                                                                                                                                                                                                                                                                                                         |               |
|--------------------------------------|-------------------------|---------------------------------------------------------------------------------------------------------------------------------------------------------------------------------------------------------------------------------------------------------------------------------------------------------------------------------------------------------------------------------------------------------|---------------|
| <i>Pantoeaananatis</i>               | aerobic                 | epiphyte or endophyte, an emerging phytopathogen infecting a wide range of important crop and forest plants, an occasional clinical isolate and a presumptive opportunistic human pathogen, associated with septicemia following penetrating trauma with plant material, nosocomial infections due to exposure to contaminated hospital materials, and secondary complications of preexisting illnesses | <sup>29</sup> |
| <i>Lactobacillus johnsonii</i>       | facultatively anaerobic | acidophilus, attachment to epithelial cells, immunomodulation, competitive exclusion of pathogens                                                                                                                                                                                                                                                                                                       | <sup>30</sup> |
| <i>Cellulomonas fimi</i>             | facultatively anaerobic | cellulolytic, secreting multi-domain glycoside hydrolases                                                                                                                                                                                                                                                                                                                                               | <sup>31</sup> |
| <i>Lactobacillus crispatus</i>       | aerobic                 | beneficial microbiota present in the vertebrate gastrointestinal and human genitourinary tracts                                                                                                                                                                                                                                                                                                         | <sup>32</sup> |
| <i>Deinococcus gobiensis</i>         | facultatively anaerobic | higher tolerance to gamma radiation and UV light than all other known microorganisms, isolated from desert                                                                                                                                                                                                                                                                                              | <sup>33</sup> |
| <i>Thauera</i> sp.                   | facultative             | isolated from activated sludge samples from industrial wastewater, ability to produce abundant exopolysaccharide and degrade various aromatic compounds with nitrate                                                                                                                                                                                                                                    | <sup>34</sup> |
| <i>Pantoea vagans</i>                | facultatively anaerobic | enterobacterial plant epiphyte of a broad range of plants, providing effective disease control of fire blight                                                                                                                                                                                                                                                                                           | <sup>35</sup> |
| <i>Clostridium perfringens</i>       | anaerobic               | a common inhabitant of the avian and mammalian gastrointestinal tracts, commensal or pathogenical                                                                                                                                                                                                                                                                                                       | <sup>36</sup> |
| <i>Lactobacillus reuteri</i>         | facultatively anaerobic | heterofermentative lactic acid bacterium that naturally inhabits the gut of humans and other animals, production of the broad-spectrum antimicrobial compound reuterin during anaerobic metabolism of glycerol                                                                                                                                                                                          | <sup>37</sup> |
| <i>Pseudomonas stutzeri</i>          | facultative             | ability to use maltose and starch as sole carbon and energy sources, degradation of environmental pollutants and high-molecular-weight polyethylene glycols, production of dinitrogen gas from nitrate, associated with human infections                                                                                                                                                                | <sup>38</sup> |
| <i>Psychrobacter cryohalolentis</i>  | aerobic                 | capable of growth at temperatures from -10°C to 30°C, isolated from permafrost                                                                                                                                                                                                                                                                                                                          | <sup>39</sup> |
| <i>Lactobacillus salivarius</i>      | anaerobic               | part of the indigenous microbiota of the gastrointestinal tract and oral cavity of humans and hamsters, isolated from human breast milk and from the intestinal tracts of swine and chickens                                                                                                                                                                                                            | <sup>40</sup> |
| <i>Bacillus megaterium</i>           | aerobic                 | with a cell length of up to 4 µm and a diameter of 1.5 µm, nonpathogenic host for the biotechnological production of several substances, including vitamin B12, penicillin acylase, and amylases                                                                                                                                                                                                        | <sup>41</sup> |
| <i>Arthrobacter arilaitensis</i>     | aerobic                 | one of the main bacterial species found at the surface of cheeses, especially in smear-ripened cheeses, where it contributes to the typical colour, flavour and texture properties of the final product                                                                                                                                                                                                 | <sup>42</sup> |
| <i>Ramlibacter tataouinensis</i>     | aerobic                 | chemo-organotrophic, cyst-producing, first isolated from meteorite fragments buried in the sands of a desert                                                                                                                                                                                                                                                                                            | <sup>43</sup> |
| <i>Nakamurella multipartita</i>      | aerobic                 | polysaccharide-accumulating, septa-forming, isolated from activated sludge acclimated with sugar-containing synthetic waste water                                                                                                                                                                                                                                                                       | <sup>44</sup> |
| <i>Streptococcus infantarius</i>     | facultatively anaerobic | ability to grow in the presence of bile, production of β-glucosidase leading to hydrolysis of aesculin                                                                                                                                                                                                                                                                                                  | <sup>45</sup> |
| <i>Mycobacterium gilvum</i>          | aerobic                 | pleomorphic, acid-fast, resistant to isoniazid, sodium aminosalicilate and rifampicin                                                                                                                                                                                                                                                                                                                   | <sup>46</sup> |
| <i>Arthrobacter chlorophenolicus</i> | aerobic                 | growth on and degradation of high concentrations of 4-chlorophenol as the sole carbon and                                                                                                                                                                                                                                                                                                               | <sup>47</sup> |

|        |                                   |                                   |                                                                                                                                                                                                                                                                                                            |
|--------|-----------------------------------|-----------------------------------|------------------------------------------------------------------------------------------------------------------------------------------------------------------------------------------------------------------------------------------------------------------------------------------------------------|
|        |                                   | energy source, isolated from soil |                                                                                                                                                                                                                                                                                                            |
|        | Methylobacterium extorquens       | aerobic                           | ability to grow on one or several reduced one carbon (C1) compounds other than methane, associated with plants 48                                                                                                                                                                                          |
|        | Methylobacterium chloromethanicum | aerobic                           | isolated from soil at a petrochemical factory in Tatarstan, Russia, able to grow using chloromethane as the sole carbon and energy source 49                                                                                                                                                               |
|        | Corynebacterium efficiens         | facultatively anaerobic           | thermostability, glutamic-acid-producing, isolated from soil and vegetables 50                                                                                                                                                                                                                             |
|        | Stenotrophomonas maltophilia      | aerobic                           | commonly found in water and soil in association with plants, beneficial effects on plants including protection from pathogens, promotion of growth, and biodegradation of pollutants; an emerging opportunistic human pathogen involved in infections at hospitals and in patients with cystic fibrosis 51 |
|        | Nocardiopsis alba                 | aerobic                           | inhibitory bioactivity against several Bacillus isolates, some Gram-positive human pathogens, or honeybee pathogens 52                                                                                                                                                                                     |
|        | Psychrobacter arcticus            | facultative                       | capable of growth at temperatures from -10°C to 28°C, isolated from permafrost 39                                                                                                                                                                                                                          |
|        | Saccharomonospora viridis         | aerobic                           | thermophile, spores can cause farmer's lung disease, bagassosis and humidifier fever, pentachlorophenol metabolism 53                                                                                                                                                                                      |
|        | Streptomyces coelicolor           | aerobic                           | broad range of metabolic processes and biotransformations, soil-dwelling, production of most natural antibiotics used in human and veterinary medicine 54                                                                                                                                                  |
|        | Leuconostoc mesenteroides         | facultative                       | lactic acid bacteria, key players responsible for kimchi fermentation 55                                                                                                                                                                                                                                   |
| Fungus | Aspergillus fumigatus             | aerobic                           | prolific conidia production, isolated from human habitats and vegetable compost heaps, a primary and opportunistic pathogen, a major allergen, linked to severe asthma and sinusitis 56                                                                                                                    |
|        | Saccharomyces cerevisiae          | facultative                       | domesticated organism that occasionally establishes synanthropic natural populations, capable of malolactic fermentation, able to form biofilms 57                                                                                                                                                         |
| Virus  | Pseudomonas phage F116            |                                   | temperate, pilus-specific, generalized transducing phage, linear dsDNA 58                                                                                                                                                                                                                                  |
|        | Human adenovirus C                |                                   | non-enveloped, icosahedral, linear dsDNA, causing a self-limited febrile illness 59                                                                                                                                                                                                                        |
|        | Enterobacteria phage P1           |                                   | lysogenizing enteric bacteria as a circular, low-copy-number plasmid 60                                                                                                                                                                                                                                    |

**Table S8.** Primers and Sanger sequencing results.

| Primers                      | Sequence                                                                                                                                                                                                                                                                                                                                                                                                                                                                                                                                                                                                                                                                                                                                                                                                                                                                                                                                                              |
|------------------------------|-----------------------------------------------------------------------------------------------------------------------------------------------------------------------------------------------------------------------------------------------------------------------------------------------------------------------------------------------------------------------------------------------------------------------------------------------------------------------------------------------------------------------------------------------------------------------------------------------------------------------------------------------------------------------------------------------------------------------------------------------------------------------------------------------------------------------------------------------------------------------------------------------------------------------------------------------------------------------|
| funga118sF                   | 5'GATACCGTYGTAGTCTTA3'                                                                                                                                                                                                                                                                                                                                                                                                                                                                                                                                                                                                                                                                                                                                                                                                                                                                                                                                                |
| funga118sR                   | 5'TGTCTGGACCTGGTGAGT3'                                                                                                                                                                                                                                                                                                                                                                                                                                                                                                                                                                                                                                                                                                                                                                                                                                                                                                                                                |
| gliIRTF                      | 5'TCGTTGCTGGAGAATCTGCTGTATGA3'                                                                                                                                                                                                                                                                                                                                                                                                                                                                                                                                                                                                                                                                                                                                                                                                                                                                                                                                        |
| gliIRTR                      | 5'ACAAAGGAATCTGGTGGAAAGGCGA3'                                                                                                                                                                                                                                                                                                                                                                                                                                                                                                                                                                                                                                                                                                                                                                                                                                                                                                                                         |
| 18s RNA gene PCR product     | GATACCGTCGTAGTCTTAACCATAAACTATGCCGACTAGGGATCGGGCGG<br>TGTTTCTATGATGACCCGCTCGGCACCTTACGAGAAATCAAAGTTTTTGGG<br>TTCTGGGGGAGTATGGTCGCAAGGCTGAAACTTAAAGAAAATTGACGGAA<br>GGCACCACAAGGCGTGGAGCCTGCGGCTTAATTTGACTCAACACGGGGA<br>AACTCACCAGTCCAGACA                                                                                                                                                                                                                                                                                                                                                                                                                                                                                                                                                                                                                                                                                                                            |
| <i>gliI</i> gene PCR product | TCGTTGCTGGAGAATCTGCTGTATGACATCTGCGAGCCGGGCAATTGCGAC<br>GGGGAGGCGTGTGATCGAGACGCCGTTCTGGGGTGCCTACCATCGGGGG<br>TTTCGTTGGCACCAGCATGCATGGTCTTAGCTGATGTATACGAATAGGGGGC<br>TTCGAGACGAGCTTCGTCCTGCGCTCCAACGTCACCGCTGTTCATGTGAGG<br>CCTCCGTGTCATGGCAATGGATCCGCAGATCTGGATCGTCTCGTGTGGCG<br>TATATTGAAGCGTACGAACGGGTTCTGCGTCAGGCCCCCTGCCGCATCAAG<br>GCCATCCTCGTGTGTAACCCGCACAATCCATGCGGGCACATCTACCCACCG<br>AGAGTAATCCAGGCCTTGCTTCAATTCGCCAACGGCATGATCTATTCTAC<br>ATCTCCGATGAGATCTACGCCCTCTCCACGCTGGATGAGCAAACCGCCTTC<br>ACCTCGGTCCTGAGCATCGATGTAGCCGCCCTGGGTGTAGACCTGGCGCGC<br>GTATTCACCCTGTACAGTATCAGCAAAGACCTCGGCAGTAGCGGATTGCG<br>ACTGGTATACTGTCTTATCTCCTCCGACTCTCAAGGCCTCCGCAGAACTGA<br>CACTGTGCAGGGCTTCGGCATCACCAAGCACATCCCGACCTGCGTCTCTC<br>CCTCGCCATCTCGAACCATTCCCGCGTCTCGACATTCACCTCGCTGGTCAT<br>CACCGCTCTCCTGCACGACCCGGAAGCCGCCACGGCAATCCTGCACCAGA<br>ATCGAGCCGCTCTGCAGCGCAGCGCCAGCTCATCAGAAAACCTTCTCGCCT<br>CACGACCGTTGGGAGAGAGTGAGAGAGAAATCGCCTTCCACCAGATTCCC<br>TTTGT |

**Table S9.** Estimated concentrations of organic carbon and elemental carbon measured in PM<sub>2.5</sub> and PM<sub>10</sub> samples.

| Sampling date | PM <sub>2.5</sub>       |                         | PM <sub>10</sub>        |                         |
|---------------|-------------------------|-------------------------|-------------------------|-------------------------|
|               | OC (µg/m <sup>3</sup> ) | EC (µg/m <sup>3</sup> ) | OC (µg/m <sup>3</sup> ) | EC (µg/m <sup>3</sup> ) |
| 01/08         | 6.753                   | 2.151                   | 9.93                    | 3.283                   |
| 01/09         | 28.537                  | 6.351                   | 36.421                  | 6.904                   |
| 01/10         | 71.036                  | 13.514                  | 59.588                  | 8.186                   |
| 01/11         | 45.022                  | 12.42                   | 53.829                  | 8.12                    |
| 01/12         | 68.733                  | 13.667                  | 68.814                  | 8.774                   |
| 01/13         | 49.18                   | 9.452                   | 53.9                    | 7.588                   |
| 01/14         | 25.429                  | 6.005                   | 32.816                  | 6.068                   |

**Table S10.** Estimated concentrations of anions and cations measured in PM<sub>2.5</sub> and PM<sub>10</sub> samples.

| Sampling date                                      | 01/08             |                  | 01/09             |                  | 01/10             |                  | 01/11             |                  | 01/12             |                  | 01/13             |                  | 01/14             |                  |
|----------------------------------------------------|-------------------|------------------|-------------------|------------------|-------------------|------------------|-------------------|------------------|-------------------|------------------|-------------------|------------------|-------------------|------------------|
|                                                    | PM <sub>2.5</sub> | PM <sub>10</sub> |
| SO <sub>4</sub> <sup>2-</sup> (µg/m <sup>3</sup> ) | 3.208             | 4.256            | 13.193            | 16.832           | 90.795            | 58.364           | 57.511            | 81.258           | 105.016           | 111.108          | 70.914            | 92.471           | 43.381            | 57.847           |
| NH <sub>4</sub> <sup>+</sup> (µg/m <sup>3</sup> )  | 5.202             | 5.698            | 18.982            | 21.078           | 62.365            | 45.588           | 44.328            | 54.280           | 62.925            | 63.475           | 48.271            | 55.871           | 36.012            | 39.618           |
| NO <sub>3</sub> <sup>-</sup> (µg/m <sup>3</sup> )  | 1.219             | 1.526            | 11.616            | 14.084           | 52.437            | 37.954           | 32.293            | 49.089           | 48.984            | 52.278           | 36.509            | 50.547           | 25.074            | 33.535           |
| K <sup>+</sup> (µg/m <sup>3</sup> )                | 0.681             | 0.928            | 3.553             | 4.451            | 14.174            | 9.214            | 9.331             | 12.663           | 17.149            | 16.621           | 19.077            | 22.134           | 8.691             | 11.241           |
| Cl <sup>-</sup> (µg/m <sup>3</sup> )               | 0.960             | 2.285            | 4.022             | 6.930            | 15.694            | 12.604           | 8.489             | 16.881           | 14.320            | 18.409           | 10.072            | 16.228           | 5.571             | 9.740            |
| Na <sup>+</sup> (µg/m <sup>3</sup> )               | 1.318             | 4.213            | 2.857             | 8.326            | 6.924             | 10.426           | 5.275             | 17.956           | 8.265             | 16.884           | 5.963             | 13.238           | 3.945             | 12.261           |
| Ca <sup>2+</sup> (µg/m <sup>3</sup> )              | 2.566             | 10.394           | 2.276             | 14.256           | 2.913             | 15.906           | 1.758             | 21.257           | 3.067             | 16.324           | 1.613             | 17.054           | 1.376             | 11.268           |
| Mg <sup>2+</sup> (µg/m <sup>3</sup> )              | 0.519             | 0.854            | 0.524             | 1.570            | 0.968             | 2.471            | 0.491             | 3.149            | 0.828             | 2.851            | 0.737             | 3.444            | 0.504             | 2.758            |
| F <sup>-</sup> (µg/m <sup>3</sup> )                | 0.060             | 0.124            | 0.181             | 0.442            | 0.505             | 0.906            | 0.270             | 0.943            | 0.417             | 0.741            | 0.352             | 1.043            | 0.148             | 0.400            |
| PO <sub>4</sub> <sup>3-</sup> (µg/m <sup>3</sup> ) | 0.021             | 0.031            | 0.035             | 0.047            | 0.070             | 0.068            | 0.050             | 0.080            | 0.070             | 0.090            | 0.051             | 0.076            | 0.042             | 0.061            |

**Table S11.** Estimated concentrations of elements measured in PM<sub>2.5</sub> and PM<sub>10</sub> samples.

| Sampling date           | 01/08             |                  | 01/09             |                  | 01/10             |                  | 01/11             |                  | 01/12             |                  | 01/13             |                  | 01/14             |                  |
|-------------------------|-------------------|------------------|-------------------|------------------|-------------------|------------------|-------------------|------------------|-------------------|------------------|-------------------|------------------|-------------------|------------------|
|                         | PM <sub>2.5</sub> | PM <sub>10</sub> |
| Fe (µg/m <sup>3</sup> ) | 0.249             | 1.844            | 0.482             | 2.479            | 1.302             | 3.389            | 0.824             | 3.496            | 2.191             | 4.543            | 2.042             | 8.048            | 1.016             | 4.564            |
| Zn (µg/m <sup>3</sup> ) | 0.046             | 0.068            | 0.285             | 0.428            | 1.227             | 1.022            | 0.586             | 0.842            | 1.695             | 1.585            | 1.104             | 1.686            | 0.561             | 0.870            |
| Pb (µg/m <sup>3</sup> ) | 0.032             | 0.040            | 0.164             | 0.221            | 0.636             | 0.452            | 0.352             | 0.437            | 1.114             | 0.890            | 1.033             | 1.271            | 0.449             | 0.576            |
| As (ug/m <sup>3</sup> ) | 0.000             | 0.002            | 0.031             | 0.051            | 0.178             | 0.168            | 0.077             | 0.095            | 0.237             | 0.221            | 0.115             | 0.139            | 0.067             | 0.092            |
| Mn (µg/m <sup>3</sup> ) | 0.000             | 0.064            | 0.056             | 0.110            | 0.147             | 0.136            | 0.085             | 0.057            | 0.141             | 0.181            | 0.002             | 0.289            | 0.080             | 0.157            |
| Br (µg/m <sup>3</sup> ) | 0.004             | 0.003            | 0.025             | 0.032            | 0.107             | 0.067            | 0.061             | 0.065            | 0.139             | 0.110            | 0.087             | 0.115            | 0.041             | 0.057            |
| Ti (µg/m <sup>3</sup> ) | 0.020             | 0.145            | 0.028             | 0.190            | 0.063             | 0.233            | 0.029             | 0.218            | 0.076             | 0.240            | 0.042             | 0.253            | 0.025             | 0.170            |
| Cr (µg/m <sup>3</sup> ) | 0.001             | 0.006            | 0.006             | 0.015            | 0.018             | 0.021            | 0.010             | 0.020            | 0.020             | 0.028            | 0.020             | 0.039            | 0.006             | 0.020            |
| Ni (µg/m <sup>3</sup> ) | 0.001             | 0.008            | 0.003             | 0.008            | 0.008             | 0.005            | 0.005             | 0.010            | 0.007             | 0.012            | 0.012             | 0.021            | 0.003             | 0.007            |

## References

- (1) Zhang, Q.; He, K.; Huo, H. *Nature* **2012**, *484*, 161.
- (2) Chow, J. C.; Watson, J. G.; Chen, L. W. A.; Chang, M. C. O.; Robinson, N. F.; Trimble, D.; Kohl, S. *Journal of the Air & Waste Management Association* **2007**, *57*, 1014.
- (3) Chow, J. C.; Watson, J. G.; Pritchett, L. C.; Pierson, W. R.; Frazier, C. A.; Purcell, R. G. *Atmospheric Environment. Part A. General Topics* **1993**, *27*, 1185.
- (4) Wilson, W. E.; Chow, J. C.; Claiborn, C.; Fusheng, W.; Engelbrecht, J.; Watson, J. G. *Chemosphere* **2002**, *49*, 1009.
- (5) Bertolini, V.; Gandolfi, I.; Ambrosini, R.; Bestetti, G.; Innocente, E.; Rampazzo, G.; Franzetti, A. *Applied microbiology and biotechnology* **2012**.
- (6) Deleon-Rodriguez, N.; Lathem, T. L.; Rodriguez, R. L.; Barazesh, J. M.; Anderson, B. E.; Beyersdorf, A. J.; Ziemba, L. D.; Bergin, M.; Nenes, A.; Konstantinidis, K. T. *Proceedings of the National Academy of Sciences of the United States of America* **2013**, *110*, 2575.
- (7) Robertson, C. E.; Baumgartner, L. K.; Harris, J. K.; Peterson, K. L.; Stevens, M. J.; Frank, D. N.; Pace, N. R. *Applied and environmental microbiology* **2013**.
- (8) Schmieder, R.; Edwards, R. *Bioinformatics* **2011**, *27*, 863.
- (9) Ivanova, N.; Sikorski, J.; Jando, M.; Munk, C.; Lapidus, A.; Glavina Del Rio, T.; Copeland, A.; Tice, H.; Cheng, J. F.; Lucas, S.; Chen, F.; Nolan, M.; Bruce, D.; Goodwin, L.; Pitluck, S.; Mavromatis, K.; Mikhailova, N.; Pati, A.; Chen, A.; Palaniappan, K.; Land, M.; Hauser, L.; Chang, Y. J.; Jeffries, C. D.; Meincke, L.; Brettin, T.; Detter, J. C.; Rohde, M.; Goker, M.; Bristow, J.; Eisen, J. A.; Markowitz, V.; Hugenholtz, P.; Kyrpides, N. C.; Klenk, H. P. *Standards in genomic sciences* **2010**, *2*, 158.
- (10) Normand, P.; Gury, J.; Pujic, P.; Chouaia, B.; Crotti, E.; Brusetti, L.; Daffonchio, D.; Vacherie, B.; Barbe, V.; Medigue, C.; Calteau, A.; Ghodhbane-Gtari, F.; Essoussi, I.; Nouioui, I.; Abbassi-Ghozzi, I.; Gtari, M. *Journal of bacteriology* **2012**, *194*, 4773.
- (11) Chouaia, B.; Crotti, E.; Brusetti, L.; Daffonchio, D.; Essoussi, I.; Nouioui, I.; Sbissi, I.; Ghodhbane-Gtari, F.; Gtari, M.; Vacherie, B.; Barbe, V.; Medigue, C.; Gury, J.; Pujic, P.; Normand, P. *Journal of bacteriology* **2012**, *194*, 2752.
- (12) Takarada, H.; Sekine, M.; Kosugi, H.; Matsuo, Y.; Fujisawa, T.; Omata, S.; Kishi, E.; Shimizu, A.; Tsukatani, N.; Tanikawa, S.; Fujita, N.; Harayama, S. *Journal of bacteriology* **2008**, *190*, 4139.
- (13) Young, M.; Artsatbanov, V.; Beller, H. R.; Chandra, G.; Chater, K. F.; Dover, L. G.; Goh, E. B.; Kahan, T.; Kaprelyants, A. S.; Kyrpides, N.; Lapidus, A.; Lowry, S. R.; Lykidis, A.; Mahillon, J.; Markowitz, V.; Mavromatis, K.; Mukamolova, G. V.; Oren, A.; Rokem, J. S.; Smith, M. C.; Young, D. I.; Greenblatt, C. L. *Journal of bacteriology* **2010**, *192*, 841.
- (14) Spieck, E.; Hartwig, C.; McCormack, I.; Maixner, F.; Wagner, M.; Lipski, A.; Daims, H. *Environmental microbiology* **2006**, *8*, 405.
- (15) Green, P. N.; Bousfield, I. J. *International Journal of Systematic Bacteriology* **1983**, *33*, 875.
- (16) Lykidis, A.; Mavromatis, K.; Ivanova, N.; Anderson, I.; Land, M.; DiBartolo, G.; Martinez, M.; Lapidus, A.; Lucas, S.; Copeland, A.; Richardson, P.; Wilson, D. B.; Kyrpides, N. *Journal of bacteriology* **2007**, *189*, 2477.
- (17) Coleman, N. V.; Wilson, N. L.; Barry, K.; Brettin, T. S.; Bruce, D. C.; Copeland, A.; Dalin, E.; Detter, J. C.; Del Rio, T. G.; Goodwin, L. A.; Hammon, N. M.; Han, S.; Hauser, L. J.; Israni, S.; Kim, E.; Kyrpides, N.; Land, M. L.; Lapidus, A.; Larimer, F. W.; Lucas, S.; Pitluck, S.; Richardson, P.; Schmutz, J.; Tapia, R.; Thompson, S.; Tice, H. N.; Spain, J. C.; Gossett, J. G.; Mattes, T. E. *Journal of bacteriology* **2011**, *193*, 3399.
- (18) Minegishi, K.; Aikawa, C.; Furukawa, A.; Watanabe, T.; Nakano, T.; Ogura, Y.; Ohtsubo, Y.; Kurokawa, K.; Hayashi, T.; Maruyama, F.; Nakagawa, I.; Eishi, Y. *Genome announcements* **2013**, *1*.
- (19) Lapidus, A.; Pukall, R.; Labuttii, K.; Copeland, A.; Del Rio, T. G.; Nolan, M.; Chen, F.; Lucas, S.; Tice, H.; Cheng, J. F.; Bruce, D.; Goodwin, L.; Pitluck, S.; Rohde, M.; Goker, M.; Pati, A.; Ivanova, N.; Mavrommatis, K.; Chen, A.; Palaniappan, K.; D'Haeseleer, P.; Chain, P.; Bristow, J.; Eisen, J. A.; Markowitz, V.; Hugenholtz, P.; Kyrpides, N. C.; Klenk, H. P. *Standards in genomic sciences* **2009**, *1*, 3.
- (20) Hulcher, F. H.; King, K. W. *Journal of bacteriology* **1958**, *76*, 565.
- (21) Kallimanis, A.; Labutti, K. M.; Lapidus, A.; Clum, A.; Lykidis, A.; Mavromatis, K.; Pagani, I.; Liolios, K.; Ivanova, N.; Goodwin, L.; Pitluck, S.; Chen, A.; Palaniappan, K.; Markowitz, V.; Bristow, J.; Velentzas, A.



- D.; Perisynakis, A.; Ouzounis, C. C.; Kyrpides, N. C.; Koukkou, A. I.; Drainas, C. *Standards in genomic sciences* **2011**, *4*, 123.
- (22) Sun, H.; Lapidus, A.; Nolan, M.; Lucas, S.; Del Rio, T. G.; Tice, H.; Cheng, J. F.; Tapia, R.; Han, C.; Goodwin, L.; Pitluck, S.; Pagani, I.; Ivanova, N.; Mavromatis, K.; Mikhailova, N.; Pati, A.; Chen, A.; Palaniappan, K.; Land, M.; Hauser, L.; Chang, Y. J.; Jeffries, C. D.; Djao, O. D.; Rohde, M.; Sikorski, J.; Goker, M.; Woyke, T.; Bristow, J.; Eisen, J. A.; Markowitz, V.; Hugenholtz, P.; Kyrpides, N. C.; Klenk, H. P. *Standards in genomic sciences* **2010**, *3*, 325.
- (23) Leisner, J. J.; Laursen, B. G.; Prevost, H.; Drider, D.; Dalgaard, P. *FEMS microbiology reviews* **2007**, *31*, 592.
- (24) of, G. o. a. N. I. o. P. d. C.; Degrading N, N.-D., T.; Wang, W. Z.; Someya, N.; Ikeda, T. *Journal of bacteriology* **2011**, *193*, 2072.
- (25) Siddavattam, D.; Karegoudar, T. B.; Mudde, S. K.; Kumar, N.; Baddam, R.; Avasthi, T. S.; Ahmed, N. *Journal of bacteriology* **2011**, *193*, 5598.
- (26) Sims, D.; Brettin, T.; Detter, J. C.; Han, C.; Lapidus, A.; Copeland, A.; Glavina Del Rio, T.; Nolan, M.; Chen, F.; Lucas, S.; Tice, H.; Cheng, J. F.; Bruce, D.; Goodwin, L.; Pitluck, S.; Ovchinnikova, G.; Pati, A.; Ivanova, N.; Mavromatis, K.; Chen, A.; Palaniappan, K.; D'Haeseleer, P.; Chain, P.; Bristow, J.; Eisen, J. A.; Markowitz, V.; Hugenholtz, P.; Schneider, S.; Goker, M.; Pukall, R.; Kyrpides, N. C.; Klenk, H. P. *Standards in genomic sciences* **2009**, *1*, 12.
- (27) Ivanova, N.; Sikorski, J.; Sims, D.; Brettin, T.; Detter, J. C.; Han, C.; Lapidus, A.; Copeland, A.; Glavina Del Rio, T.; Nolan, M.; Chen, F.; Lucas, S.; Tice, H.; Cheng, J. F.; Bruce, D.; Goodwin, L.; Pitluck, S.; Pati, A.; Mavromatis, K.; Chen, A.; Palaniappan, K.; D'Haeseleer, P.; Chain, P.; Bristow, J.; Eisen, J. A.; Markowitz, V.; Hugenholtz, P.; Goker, M.; Pukall, R.; Klenk, H. P.; Kyrpides, N. C. *Standards in genomic sciences* **2009**, *1*, 110.
- (28) Phillips, R. W.; Wiegel, J.; Berry, C. J.; Fliermans, C.; Peacock, A. D.; White, D. C.; Shimkets, L. J. *International journal of systematic and evolutionary microbiology* **2002**, *52*, 933.
- (29) De Maayer, P.; Chan, W. Y.; Rezzonico, F.; Buhlmann, A.; Venter, S. N.; Blom, J.; Goesmann, A.; Frey, J. E.; Smits, T. H.; Duffy, B.; Coutinho, T. A. *Journal of bacteriology* **2012**, *194*, 1615.
- (30) Wegmann, U.; Overweg, K.; Horn, N.; Goesmann, A.; Narbad, A.; Gasson, M. J.; Shearman, C. *Journal of bacteriology* **2009**, *191*, 7142.
- (31) Christopherson, M. R.; Suen, G.; Bramhacharya, S.; Jewell, K. A.; Aylward, F. O.; Mead, D.; Brumm, P. J. *PloS one* **2013**, *8*, e53954.
- (32) Ojala, T.; Kuparinen, V.; Koskinen, J. P.; Alatalo, E.; Holm, L.; Auvinen, P.; Edelman, S.; Westerlund-Wikstrom, B.; Korhonen, T. K.; Paulin, L.; Kankainen, M. *Journal of bacteriology* **2010**, *192*, 3547.
- (33) Yuan, M.; Chen, M.; Zhang, W.; Lu, W.; Wang, J.; Yang, M.; Zhao, P.; Tang, R.; Li, X.; Hao, Y.; Zhou, Z.; Zhan, Y.; Yu, H.; Teng, C.; Yan, Y.; Ping, S.; Wang, Y.; Lin, M. *PloS one* **2012**, *7*, e34458.
- (34) Jiang, K.; Sanseverino, J.; Chauhan, A.; Lucas, S.; Copeland, A.; Lapidus, A.; Del Rio, T. G.; Dalin, E.; Tice, H.; Bruce, D.; Goodwin, L.; Pitluck, S.; Sims, D.; Brettin, T.; Detter, J. C.; Han, C.; Chang, Y. J.; Larimer, F.; Land, M.; Hauser, L.; Kyrpides, N. C.; Mikhailova, N.; Moser, S.; Jegier, P.; Close, D.; Debruyne, J. M.; Wang, Y.; Layton, A. C.; Allen, M. S.; Sayler, G. S. *Standards in genomic sciences* **2012**, *6*, 325.
- (35) Smits, T. H.; Rezzonico, F.; Kamber, T.; Goesmann, A.; Ishimaru, C. A.; Stockwell, V. O.; Frey, J. E.; Duffy, B. *Journal of bacteriology* **2010**, *192*, 6486.
- (36) Nowell, V. J.; Kropinski, A. M.; Songer, J. G.; MacInnes, J. I.; Parreira, V. R.; Prescott, J. F. *PloS one* **2012**, *7*, e32271.
- (37) Morita, H.; Toh, H.; Fukuda, S.; Horikawa, H.; Oshima, K.; Suzuki, T.; Murakami, M.; Hisamatsu, S.; Kato, Y.; Takizawa, T.; Fukuoka, H.; Yoshimura, T.; Itoh, K.; O'Sullivan, D. J.; McKay, L. L.; Ohno, H.; Kikuchi, J.; Masaoka, T.; Hattori, M. *DNA research : an international journal for rapid publication of reports on genes and genomes* **2008**, *15*, 151.
- (38) Ginard, M.; Lalucat, J.; Tummler, B.; Romling, U. *Int J Syst Bacteriol* **1997**, *47*, 132.
- (39) Bakermans, C.; Ayala-del-Rio, H. L.; Ponder, M. A.; Vishnivetskaya, T.; Gilichinsky, D.; Thomashow, M. F.; Tiedje, J. M. *International journal of systematic and evolutionary microbiology* **2006**, *56*, 1285.
- (40) Raftis, E. J.; Salvetti, E.; Torriani, S.; Felis, G. E.; O'Toole, P. W. *Applied and environmental*

*microbiology* **2011**, *77*, 954.

(41) Eppinger, M.; Bunk, B.; Johns, M. A.; Edirisinghe, J. N.; Kutumbaka, K. K.; Koenig, S. S.; Creasy, H. H.; Rosovitz, M. J.; Riley, D. R.; Daugherty, S.; Martin, M.; Elbourne, L. D.; Paulsen, I.; Biedendieck, R.; Braun, C.; Grayburn, S.; Dhingra, S.; Lukyanchuk, V.; Ball, B.; Ul-Qamar, R.; Seibel, J.; Bremer, E.; Jahn, D.; Ravel, J.; Vary, P. S. *Journal of bacteriology* **2011**, *193*, 4199.

(42) Monnet, C.; Loux, V.; Gibrat, J. F.; Spinnler, E.; Barbe, V.; Vacherie, B.; Gavory, F.; Gournayre, E.; Siguier, P.; Chandler, M.; Elleuch, R.; Irlinger, F.; Vallaeys, T. *PloS one* **2010**, *5*, e15489.

(43) De Luca, G.; Barakat, M.; Ortet, P.; Fochesato, S.; Jourlin-Castelli, C.; Ansaldi, M.; Py, B.; Fichant, G.; Coutinho, P. M.; Voulhoux, R.; Bastien, O.; Marechal, E.; Henrissat, B.; Quentin, Y.; Noirot, P.; Filloux, A.; Mejean, V.; DuBow, M. S.; Barras, F.; Barbe, V.; Weissenbach, J.; Mihalcescu, I.; Vermeglio, A.; Achouak, W.; Heulin, T. *PloS one* **2011**, *6*, e23784.

(44) Tice, H.; Mayilraj, S.; Sims, D.; Lapidus, A.; Nolan, M.; Lucas, S.; Glavina Del Rio, T.; Copeland, A.; Cheng, J. F.; Meincke, L.; Bruce, D.; Goodwin, L.; Pitluck, S.; Ivanova, N.; Mavromatis, K.; Ovchinnikova, G.; Pati, A.; Chen, A.; Palaniappan, K.; Land, M.; Hauser, L.; Chang, Y. J.; Jeffries, C. D.; Detter, J. C.; Brettin, T.; Rohde, M.; Goker, M.; Bristow, J.; Eisen, J. A.; Markowitz, V.; Hugenholtz, P.; Kyrpides, N. C.; Klenk, H. P.; Chen, F. *Standards in genomic sciences* **2010**, *2*, 168.

(45) Schlegel, L.; Grimont, F.; Collins, M. D.; Regnault, B.; Grimont, P. A.; Bouvet, A. *International journal of systematic and evolutionary microbiology* **2000**, *50 Pt 4*, 1425.

(46) Kallimanis, A.; Karabika, E.; Mavromatis, K.; Lapidus, A.; Labutti, K. M.; Liolios, K.; Ivanova, N.; Goodwin, L.; Woyke, T.; Velentzas, A. D.; Perisynakis, A.; Ouzounis, C. C.; Kyrpides, N. C.; Koukkou, A. I.; Drinas, C. *Standards in genomic sciences* **2011**, *5*, 144.

(47) Westerberg, K.; Elvang, A. M.; Stackebrandt, E.; Jansson, J. K. *International journal of systematic and evolutionary microbiology* **2000**, *50 Pt 6*, 2083.

(48) Vuilleumier, S.; Chistoserdova, L.; Lee, M. C.; Bringel, F.; Lajus, A.; Zhou, Y.; Gourion, B.; Barbe, V.; Chang, J.; Cruveiller, S.; Dossat, C.; Gillett, W.; Gruffaz, C.; Haugen, E.; Hourcade, E.; Levy, R.; Mangenot, S.; Muller, E.; Nadalig, T.; Pagni, M.; Penny, C.; Peyraud, R.; Robinson, D. G.; Roche, D.; Rouy, Z.; Saenampekhe, C.; Salvignol, G.; Vallenet, D.; Wu, Z.; Marx, C. J.; Vorholt, J. A.; Olson, M. V.; Kaul, R.; Weissenbach, J.; Medigue, C.; Lidstrom, M. E. *PloS one* **2009**, *4*, e5584.

(49) McDonald, I. R.; Doronina, N. V.; Trotsenko, Y. A.; McAnulla, C.; Murrell, J. C. *International journal of systematic and evolutionary microbiology* **2001**, *51*, 119.

(50) Fudou, R.; Jojima, Y.; Seto, A.; Yamada, K.; Kimura, E.; Nakamatsu, T.; Hiraishi, A.; Yamanaka, S. *International journal of systematic and evolutionary microbiology* **2002**, *52*, 1127.

(51) Lira, F.; Hernandez, A.; Belda, E.; Sanchez, M. B.; Moya, A.; Silva, F. J.; Martinez, J. L. *Journal of bacteriology* **2012**, *194*, 3563.

(52) Qiao, J.; Chen, L.; Li, Y.; Wang, J.; Zhang, W.; Chen, S. *Journal of bacteriology* **2012**, *194*, 6358.

(53) Pati, A.; Sikorski, J.; Nolan, M.; Lapidus, A.; Copeland, A.; Glavina Del Rio, T.; Lucas, S.; Chen, F.; Tice, H.; Pitluck, S.; Cheng, J. F.; Chertkov, O.; Brettin, T.; Han, C.; Detter, J. C.; Kuske, C.; Bruce, D.; Goodwin, L.; Chain, P.; D'Haeseleer, P.; Chen, A.; Palaniappan, K.; Ivanova, N.; Mavromatis, K.; Mikhailova, N.; Rohde, M.; Tindall, B. J.; Goker, M.; Bristow, J.; Eisen, J. A.; Markowitz, V.; Hugenholtz, P.; Kyrpides, N. C.; Klenk, H. P. *Standards in genomic sciences* **2009**, *1*, 141.

(54) Bentley, S. D.; Chater, K. F.; Cerdeno-Tarraga, A. M.; Challis, G. L.; Thomson, N. R.; James, K. D.; Harris, D. E.; Quail, M. A.; Kieser, H.; Harper, D.; Bateman, A.; Brown, S.; Chandra, G.; Chen, C. W.; Collins, M.; Cronin, A.; Fraser, A.; Goble, A.; Hidalgo, J.; Hornsby, T.; Howarth, S.; Huang, C. H.; Kieser, T.; Larke, L.; Murphy, L.; Oliver, K.; O'Neil, S.; Rabinowitsch, E.; Rajandream, M. A.; Rutherford, K.; Rutter, S.; Seeger, K.; Saunders, D.; Sharp, S.; Squares, R.; Squares, S.; Taylor, K.; Warren, T.; Wietzorrek, A.; Woodward, J.; Barrell, B. G.; Parkhill, J.; Hopwood, D. A. *Nature* **2002**, *417*, 141.

(55) Jung, J. Y.; Lee, S. H.; Lee, S. H.; Jeon, C. O. *Journal of bacteriology* **2012**, *194*, 730.

(56) Nierman, W. C.; Pain, A.; Anderson, M. J.; Wortman, J. R.; Kim, H. S.; Arroyo, J.; Berriman, M.; Abe, K.; Archer, D. B.; Bermejo, C.; Bennett, J.; Bowyer, P.; Chen, D.; Collins, M.; Coulsen, R.; Davies, R.; Dyer, P. S.; Farman, M.; Fedorova, N.; Fedorova, N.; Feldblyum, T. V.; Fischer, R.; Fosker, N.; Fraser, A.; Garcia, J. L.; Garcia, M. J.; Goble, A.; Goldman, G. H.; Gomi, K.; Griffith-Jones, S.; Gwilliam, R.; Haas, B.; Haas, H.; Harris, D.; Horiuchi, H.; Huang, J.; Humphray, S.; Jimenez, J.; Keller, N.; Khouri, H.; Kitamoto, K.; Kobayashi, T.;

Konzack, S.; Kulkarni, R.; Kumagai, T.; Lafon, A.; Latge, J. P.; Li, W.; Lord, A.; Lu, C.; Majoros, W. H.; May, G. S.; Miller, B. L.; Mohamoud, Y.; Molina, M.; Monod, M.; Mouyna, I.; Mulligan, S.; Murphy, L.; O'Neil, S.; Paulsen, I.; Penalva, M. A.; Pertea, M.; Price, C.; Pritchard, B. L.; Quail, M. A.; Rabbinowitsch, E.; Rawlins, N.; Rajandream, M. A.; Reichard, U.; Renauld, H.; Robson, G. D.; Rodriguez de Cordoba, S.; Rodriguez-Pena, J. M.; Ronning, C. M.; Rutter, S.; Salzberg, S. L.; Sanchez, M.; Sanchez-Ferrero, J. C.; Saunders, D.; Seeger, K.; Squares, R.; Squares, S.; Takeuchi, M.; Tekaiia, F.; Turner, G.; Vazquez de Aldana, C. R.; Weidman, J.; White, O.; Woodward, J.; Yu, J. H.; Fraser, C.; Galagan, J. E.; Asai, K.; Machida, M.; Hall, N.; Barrell, B.; Denning, D. *W. Nature* **2005**, *438*, 1151.

(57) Sniegowski, P. D.; Dombrowski, P. G.; Fingerman, E. *FEMS yeast research* **2002**, *1*, 299.

(58) Byrne, M.; Kropinski, A. M. *Gene* **2005**, *346*, 187.

(59) Davison, A. J.; Benko, M.; Harrach, B. *The Journal of general virology* **2003**, *84*, 2895.

(60) Lobočka, M. B.; Rose, D. J.; Plunkett, G., 3rd; Rusin, M.; Samojedny, A.; Lehnherr, H.; Yarmolinsky, M. B.; Blattner, F. R. *Journal of bacteriology* **2004**, *186*, 7032.
